# Supplementary material for: Hookah's new popularity among US college students: a pilot study of the characteristics of hookah smokers and their Facebook displays
Source: PubMed Central journal article supplement — BMJ Open. 2012 Dec 13;2(6):e001709. doi: 10.1136/bmjopen-2012-001709 (PMC3533013; doi:10.1136/bmjopen-2012-001709), 2012-12-13
Supplement: bmjopen-2012-001709.draft_revisions.pdf [file bmjopen-2012-001709.draft_revisions.pdf]

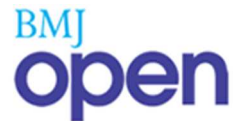

**Hookah's New Popularity Among US College Students: A  
Cross-Sectional Study of the Characteristics of Hookah  
Smokers and Their Facebook Displays**

|                                 |                                                                                                                                                                                                                                                                                                                                      |
|---------------------------------|--------------------------------------------------------------------------------------------------------------------------------------------------------------------------------------------------------------------------------------------------------------------------------------------------------------------------------------|
| Journal:                        | <i>BMJ Open</i>                                                                                                                                                                                                                                                                                                                      |
| Manuscript ID:                  | bmjopen-2012-001709                                                                                                                                                                                                                                                                                                                  |
| Article Type:                   | Research                                                                                                                                                                                                                                                                                                                             |
| Date Submitted by the Author:   | 08-Aug-2012                                                                                                                                                                                                                                                                                                                          |
| Complete List of Authors:       | Brockman, Libby; Seattle Children's Research Institute, Center for Child Health Behavior and Development<br>Pumper, Megan; University of Wisconsin-Madison, Pediatrics<br>Christakis, Dimitri; Seattle Children's Research Institute, Center for Child Health Behavior<br>Moreno, Megan; University of Wisconsin-Madison, Pediatrics |
| <b>Primary Subject Heading</b>: | Smoking and tobacco                                                                                                                                                                                                                                                                                                                  |
| Secondary Subject Heading:      | Public health, Addiction                                                                                                                                                                                                                                                                                                             |
| Keywords:                       | Non-accidental injury < PAEDIATRICS, PUBLIC HEALTH, PAEDIATRICS                                                                                                                                                                                                                                                                      |
|                                 |                                                                                                                                                                                                                                                                                                                                      |

SCHOLARONE™  
Manuscripts

1  
2  
3 **Hookah's New Popularity Among US College Students: A Cross-Sectional**  
4  
5  
6 **Study of The Characteristics of Hookah Smokers and Their Facebook**  
7

8  
9 **Displays**  
10

11  
12  
13  
14 Libby N Brockman<sup>1,2</sup>, Megan A Pumper<sup>3</sup>, Dimitri A Christakis, MD, MPH<sup>1,2</sup>, Megan A Moreno,

15  
16 MD, MEd, MPH<sup>3</sup>  
17

18  
19 <sup>1</sup>Center for Child Health Behavior and Development, Seattle Children's Research Institute,

20  
21 Seattle, WA USA, <sup>2</sup>School of Public Health, University of Washington, Seattle, WA USA,

22  
23 <sup>3</sup>Department of Pediatrics, University of Wisconsin, Madison, WI USA  
24  
25  
26  
27  
28  
29  
30  
31  
32

33 **CORRESPONDING AUTHOR:**  
34

35 Libby N Brockman  
36

37  
38 Seattle Children's Research Institute  
39

40 Center for Child Health Behavior and Development  
41

42 M/S CW8-6, PO Box 5371; Seattle, WA 98145  
43

44 Libby.brockman@seattlechildrens.org  
45

46  
47 Work: 206-884-5074, Fax: 206-884-7801  
48  
49  
50  
51

52 **Keywords:** Hookah, tobacco, smoking, college students, social networking website  
53

54 Word Count: 3,178  
55  
56  
57  
58  
59  
60

## ABSTRACT

**Objectives:** (1) To determine the prevalence of hookah use among US college students. (2) To identify substances commonly smoked in hookahs and other substance use characteristics of hookah smokers. (3) Given the powerful influence of Facebook and its potential role in promoting behaviors, to assess the prevalence of hookah references on Facebook profiles.

**Design:** Cross sectional study.

**Setting:** Two large US universities; www.Facebook.com.

**Participants:** 307 Facebook profiles were coded and 216 of these profile owners completed an online survey. On average, participants were 18.8 years old (SD=0.7), female (54%), Caucasian (70.4%), and approximately half were from each university.

**Outcome measures:** Lifetime and frequency of hookah use, substance smoked in hookah, cigarette and marijuana use, hookah references displayed on Facebook.

**Results:** 27.8% of participants endorsed hookah use; there were no significant differences between age, gender, race, or university for hookah use. Hookah users reported smoking tobacco (78%), hash (12%) and both tobacco and marijuana/hash (10%) in their hookah. Compared to non-hookah smokers, hookah smokers were more likely to report using cigarettes (OR=3.41,95%CI=1.2-9.64) and marijuana (OR=15.01,95%CI= 6.5-34.65). Hookah references were present on 5% of Facebook profiles.

**Conclusions:** More than one quarter of college students smoke hookah. Most smoke tobacco in their hookah, and hookah smoking is associated with polysubstance use. Some hookah users reference this this behavior on Facebook. Hookah may present new risks for nicotine addiction in this population.

## INTRODUCTION

Tobacco use is the leading preventable cause of morbidity and mortality worldwide. Encouragingly, public health efforts have successfully decreased the prevalence of cigarette smoking in the US by half over the past 45 years.[1] This achievement is attributed to the first Surgeon General's report on smoking and health in 1964, taxation, indoor smoking bans, media advertising restrictions and counter-advertising campaigns, and increased public awareness of the harms associated with cigarette smoking.[2]

Despite this laudable public health accomplishment, the use of alternative forms of tobacco is currently rising, threatening these successful efforts. Of particular concern is the increasing popularity of hookah.[3] Hookah use, also known as shisha, narghile and waterpipe, is defined as the smoking of substances through a waterpipe such that the smoke passes through water and is cooled prior to inhalation. Smoking a waterpipe is a tradition dating back at least four centuries to origins in northern Africa and southwest Asia.[4] Until recently, smoking in this fashion remained primarily a tradition observed in Middle Eastern countries, most popular among adult men.[5]

Presently, hookah smoking is becoming an increasingly popular form of tobacco use worldwide. Spreading from the Eastern Mediterranean region, hookah use is now common in Western countries including Australia, the United Kingdom, Canada and the United States.[3] Further, hookah is becoming increasingly popular among youth. A recent global surveillance study examining time trends (1999-2008) of tobacco use in youth found an increase in hookah smoking amongst teens as young as 13-15 year olds.[3, 6] In the United States, adolescents and young adults are at the forefront of this resurgence.

1  
2  
3 Our understanding of smoking patterns among youth is incomplete. While hashish or  
4 opium were once smoked in hookahs in the Middle East and India,[5, 7] smoking tobacco in  
5 hookahs was popularized in the 1990s with the introduction of *maasel*, a sweetened and flavored  
6 tobacco product.[3] Some reports suggest marijuana, hashish or other drugs are sometimes added  
7 to hookah tobacco.[8] However, the predominate substances smoked in hookahs and other  
8 substance use practices of hookah users among US teens remain unknown.  
9

10  
11 Therefore, the primary purpose of this study was to investigate the lifetime prevalence of  
12 hookah smoking amongst undergraduate students at two large public universities in different  
13 regions of the US. The second aim of this study was to identify the specific substance use  
14 practices of hookah smokers, including the predominant substance that young adults smoke in  
15 their hookah, and other substance use characteristics of hookah smokers. Identifying these  
16 characteristics of hookah smokers has numerous public health and clinical implications, and is a  
17 necessary step in developing targeted prevention and intervention strategies.  
18  
19

20  
21 Finally, how and why hookah smoking is gaining popularity among young adults also  
22 remains unclear. Many attribute hookah's popularity to its social nature; hookah use is a shared,  
23 communal experience and two or more people often share a single waterpipe.[4, 6] It is also  
24 possible that new forms of media are playing a role in promoting hookah smoking among young  
25 adults. Recent work suggests hookah-related videos on YouTube, compared to cigarette-related  
26 videos, are less likely to reference the harmful consequences of smoking nor provide anti-  
27 smoking messages.[9] As the cultivation theory suggests, online videos may influence viewers'  
28 opinions and perceptions; videos that fail to portray the negative consequences of hookah  
29 smoking may serve to promote this behavior among young adults.[10]  
30  
31  
32  
33  
34  
35  
36  
37  
38  
39  
40  
41  
42  
43  
44  
45  
46  
47  
48  
49  
50  
51  
52  
53  
54  
55  
56  
57  
58  
59  
60

1  
2  
3 We hypothesize that social networking websites (SNSs) may also popularize hookah  
4 smoking by serving as a venue in which young adults learn about and promote hookah use  
5 among their social groups. In recent years, SNSs such as Facebook, have become a tremendously  
6 popular source of social media among adolescents and young adults; Facebook is now used by  
7 over 90% of college students and is the most popular SNS among university students.[11] While  
8 previous studies have found associations between consuming media, such as television and  
9 movies, depicting tobacco and the initiation of tobacco use, it has been argued that Facebook  
10 may have greater influence than traditional media because Facebook combines the power of  
11 interpersonal persuasion with the reach of mass media. [12, 13] Specifically for adolescents and  
12 young adults, for whom peers are the most important source of influence, the power of  
13 interpersonal persuasion cannot be underestimated.[14] Some suggest these websites may serve  
14 as a media “super-peer” by promoting norms of behavior among adolescents.[15] Additionally,  
15 social learning theory predicts that adolescents observe, imitate, and model behaviors they see in  
16 their peers.

17  
18 Thus, the third objective of this study was to conduct an exploratory investigation of the  
19 presence of hookah references on Facebook. As a social networking site, Facebook may provide  
20 a venue for peer interaction and social networking, both of which are recognized as contributors  
21 to risk behaviors.[16] Risk behaviors such as alcohol and drug use have been found to be  
22 displayed on SNS profiles.[16] We therefore anticipate that hookah is also displayed online  
23 within social networks, but the extent to which this is so remains unknown.

## 54 METHODS

1  
2  
3 This study was conducted between September 2009 and December 2011 and received  
4 IRB approval from both the University of Wisconsin and the University of Washington.  
5  
6

### 7 8 **Setting and subjects** 9

10 Participants for this study attended one of two large, public universities, in the Midwest  
11 and on the West Coast. Participants were recruited via the social networking website Facebook  
12 (www.Facebook.com). This SNS was selected because it is the most popular SNS among our  
13 target population of college students.[17] We investigated publicly available Facebook profiles  
14 of these undergraduate students. Inclusion criteria required profile owners to report an age on  
15 their profile between 18 and 20 years, and to show evidence of profile activity within the last 30  
16 days. We only analyzed Facebook profiles for which we could confirm the profile owner's  
17 identity by calling a phone number listed on either the university directory or Facebook profile.  
18  
19  
20  
21  
22  
23  
24  
25  
26  
27  
28

### 29 **Subject selection** 30

31 In order to reach a target sample size of 200 participants, a total of 307 Facebook profiles  
32 owners were identified in 2009 and 2010 and invited to participate in the study. Eligible profiles  
33 were identified by a random search of the freshmen, sophomore and junior undergraduate classes  
34 at our two selected universities using the Facebook search engine. All profiles returned in the  
35 search results were assessed sequentially for eligibility until the target sample size was reached.  
36 Profiles were excluded if they did not meet search criteria (ie, incorrectly listed), including those  
37 who were not undergraduates (N=448), did not meet the age criteria (N=313) or did not display  
38 their age (N=49). Profiles were also excluded if their profiles were completely private, had any  
39 one of the following sections set to private: information section, wall or photographs (N=1630),  
40 or if the profile owner was not reachable for recruitment (ie, no phone number or email listed on  
41  
42  
43  
44  
45  
46  
47  
48  
49  
50  
51  
52  
53  
54  
55  
56  
57  
58  
59  
60

1  
2  
3 Facebook profile or in the university directory) (N=303). Demographic data was recorded from  
4  
5 eligible profiles.  
6  
7

### 8 **Recruitment**

9  
10 The 307 profile owners with profiles that met inclusion criteria were called on the phone.  
11  
12 After verifying the profile owner's identity, the study was explained to the profile owner and  
13  
14 permission was requested to send an email that contained further information about the study. If  
15  
16 the participant consented to receive the email, an email was sent that provided detailed  
17  
18 information about the study as well as a link to an online survey. The survey was administered  
19  
20 online via a Catalyst WebQ online survey engine. Survey respondents were provided a \$15  
21  
22 iTunes gift card as compensation.  
23  
24  
25  
26

### 27 **Survey**

28  
29 The online survey evaluated hookah use. Participants were asked about their lifetime  
30  
31 experience using hookah. Those who reported ever using hookah were also questioned about  
32  
33 their frequency of use; answer options included never, monthly or less, 2-4 times a month, 2-3  
34  
35 times a week, 4 or more times a week. Participants were also asked what substances they  
36  
37 typically smoked in their hookah; answer options included tobacco, marijuana, hash, a mix of  
38  
39 marijuana/hash and tobacco. All participants were also questioned about their lifetime experience  
40  
41 and frequency of use of marijuana and cigarettes, with similar answer options for frequency as  
42  
43 described above.  
44  
45  
46  
47

### 48 **Facebook Profile Coding**

49  
50 To investigate the presence of hookah references on college student's Facebook profiles, all  
51  
52 profiles were evaluated once by one of three trained coders using our research codebook. We  
53  
54 have used this codebook in our previous work evaluating the display of health risk behavior  
55  
56  
57  
58  
59  
60



1  
2  
3 references on SNS profiles.[18, 19] In order to determine whether hookah references were  
4 present, coders viewed all publicly accessible elements of the Facebook profile including profile  
5 owners' tagged pictures, profile pictures, information sections, and their Wall. Both images and  
6 text were coded and hookah reference data included the coder's typewritten description of any  
7 image references or verbatim text from profiles usually found in the form of status updates or in  
8 info section. If present, identifiable information was removed from text references. One year of  
9 profile data was assessed for each participant, starting from the date of evaluation and going back  
10 to the same date, one year prior.  
11  
12  
13  
14  
15  
16  
17  
18  
19  
20  
21

22 Profiles were categorized into one of two groups. Profiles with one or more references to  
23 hookah use were classified as hookah "Displayers". Example references included personal  
24 photographs in which the profile owner was smoking a hookah, or text references describing  
25 smoking hookah. Only photographs that contained the profile owner with a clearly identifiable  
26 hookah and text references that explicitly mentioned the word hookah or a synonym of hookah,  
27 such as shisha or narghile, were coded. Profiles without any hookah references were considered  
28 "Non-Displayers".  
29  
30  
31  
32  
33  
34  
35  
36  
37  
38

39 Because of infrequent references to hookah on Facebook, interater agreement was used to  
40 assess coder reliability. A 20% random subsample of profiles was evaluated by all three coders  
41 and we found 96% interrater reliability.  
42  
43  
44  
45

## 46 Analysis

47 Demographic characteristics, frequency and prevalence of hookah use, and Facebook  
48 displays of hookah were summarized using descriptive statistics. Bivariate logistic regression  
49 was used to examine covariates of lifetime hookah use (outcome); odds ratios and their 95%  
50 confidence intervals were obtained for independent variables including age, gender,  
51  
52  
53  
54  
55  
56  
57  
58  
59  
60

race/ethnicity, university, and substance use. We also fit a multivariate model of lifetime hookah use that included age, gender, race/ethnicity, university, and substance use covariates. Bivariate comparisons between demographic characteristics and hookah Displayer/Non-Displayer groups were conducted using Fisher's exact tests and Chi squared tests. All statistical analyses were conducted using STATA version 11.0 (Statacorp, College Station, TX). A two-sided p-value  $p < 0.05$  was considered statistically significant.

## RESULTS

### Subjects

A total of 307 profile owners were invited to participate in this study. All 307 participants profiles were coded for references to hookah use, and 216 (70% response rate) participants completed all survey questions with viable answers and were included in our analyses. Participants had an average age of 18.8 years (SD 0.7), were 54.2% female and 70.4% Caucasian. Approximately half of participants were from each university. See Table 1 for further details. (Table 1)

**Table 1. Descriptive characteristics of survey respondents (n=216)**

| Variable                    | Percent (n) |                          |                     |
|-----------------------------|-------------|--------------------------|---------------------|
|                             | Total       | Hookah Non-Users (n=153) | Hookah Users (n=60) |
| Age (yr) <sup>a</sup>       |             |                          |                     |
| 18                          | 35.7% (77)  | 36.5% (57)               | 33.3% (20)          |
| 19                          | 50.9% (110) | 48.1% (75)               | 58.3% (35)          |
| 20                          | 13.4% (29)  | 15.4% (24)               | 8.33% (5)           |
| Gender                      |             |                          |                     |
| Male                        | 47.2% (102) | 45.5% (71)               | 51.7% (31)          |
| Female                      | 52.8% (114) | 54.5% (85)               | 48.3% (29)          |
| State                       |             |                          |                     |
| Washington                  | 46.8% (101) | 47.4% (74)               | 45.0% (27)          |
| Wisconsin                   | 53.2% (115) | 52.6% (82)               | 55.0% (33)          |
| Race/Ethnicity <sup>b</sup> |             |                          |                     |
| Caucasian                   | 70.4% (150) | 68.0% (104)              | 76.7% (46)          |
| African American            | 0%          | 0%                       | 0%                  |

|                                                  |            |            |           |
|--------------------------------------------------|------------|------------|-----------|
| Asian/Pacific Islander                           | 18.8% (40) | 20.9% (32) | 13.3% (8) |
| Hispanic                                         | 2.3% (5)   | 2.6% (4)   | 1.7% (1)  |
| Other/Multiracial                                | 8.5% (18)  | 8.5% (13)  | 8.3% (5)  |
| <sup>a</sup> Overall mean (SD), 18.8 (0.7) years |            |            |           |
| <sup>b</sup> 3 missing values                    |            |            |           |

## Survey Results

### *Prevalence of hookah use*

Lifetime hookah use was reported by 27.8% of participants (Table 2). Participants who reported ever using hookah were on average 18.8 (SD 0.6) years of age, and tended to be male (51.7%) and White (76.7%) (Table 1). There were no significant differences between age, gender, race, or university for hookah use. Of those who endorsed ever smoking hookah, 78.3% smoked hookah monthly or less and 21.6% were current users who reported smoking hookah more than once per month.

**Table 2. Survey Results: Endorsement of Substance Use**

| Variable                      | Percent (n) |                  |              |
|-------------------------------|-------------|------------------|--------------|
|                               | Total       | Hookah Non-Users | Hookah Users |
| Hookah                        | 27.8% (60)  | 0%               | 100% (60)    |
| Cigarettes                    | 16.2% (35)  | 7.1% (11)        | 40% (24)     |
| Marijuana <sup>a</sup>        | 30.7% (66)  | 13.6% (21)       | 75% (45)     |
| <sup>a</sup> 3 missing values |             |                  |              |

### *Hookah users engagement with other substances*

Of those who reported ever using hookah, 40% reported ever smoking cigarettes, of whom 42.7% endorsed smoking cigarettes more than once a month. Most (75%) hookah users reported ever using marijuana, of whom 51% reported using marijuana more than once per month. No hookah users endorsed cigarette use only; among hookah users who endorsed cigarette use, 33.3% also reported smoking marijuana. (Table 2)

Multivariate modeling of lifetime hookah use indicated that those who endorsed hookah use were more likely to report other substance use. Hookah users were more likely to use cigarettes (OR=3.41,  $p<0.05$ ) and marijuana (OR=15.01,  $p<0.001$ ) compared to non-hookah smokers. (Table 3)

**Table 3. Multivariate logistic regression modeling of lifetime hookah use (n=216)**

| Variable               | Unadjusted OR (95% CI) | Adjusted OR* (95% CI) |
|------------------------|------------------------|-----------------------|
| <b>Age</b>             | 0.92 (0.58-1.44)       | 0.86 (0.47-1.57)      |
| <b>Gender</b>          | 0.78 (0.43-1.42)       | 1.22 (0.55-2.70)      |
| <b>Race</b>            |                        |                       |
| Caucasian              | Reference group        | Reference group       |
| Asian/Pacific Islander | 0.57 (0.24-1.32)       | 0.59 (0.18-1.99)      |
| Hispanic               | 0.57 (0.60-5.20)       | 0.19 (.02-2.45)       |
| Other/Multiracial      | 0.87 (0.29-2.58)       | 2.25 (0.58-8.75)      |
| <b>University</b>      | 1.1 (0.61-2.00)        | 0.95 (0.40-2.26)      |
| <b>Cigarettes</b>      | 8.79 (3.94-19.59)      | 3.41 (1.20-9.64)**    |
| <b>Marijuana</b>       | 19.14 (9.10-40.27)     | 15.01 (6.50-34.65)**  |

\* Odds ratios were adjusted for all other variables in the table  
 \*\*  $p<0.05$

### Facebook results

Hookah references were present on 5.3% of Facebook profiles. There were no significant differences in hookah display between gender, race, or university. Examples of hookah references included personal images of profile owners smoking a hookah, downloaded images of icons saying “ I ♥ HOOKAH”, or status updates such as “Tonight is a hookah type of night, I love nights like these” and “Skippin’ class all day, goin’ hookah shopping, fun!”

## DISCUSSION

This study explored characteristics of college student hookah smokers and evaluated the presence of hookah references displayed on university students’ Facebook pages. More than one quarter of college students reported smoking hookah and this prevalence estimate is consistent

1  
2  
3 with those found in other studies.[20-22] To our knowledge, this is the first study to survey  
4 college students about what substances they smoke in their hookah. The majority of hookah  
5 smokers reported smoking tobacco in their hookah, yet more than 20% reported experience with  
6 using marijuana or hash in their hookah. These findings support the rising popularity and  
7 diversity of hookah use among young adults in the US.  
8  
9

10  
11  
12  
13  
14  
15 The finding that so many students are smoking hookah, and specifically smoking tobacco  
16 in their hookah, is cause for clinical and public health concern. Although the health effects of  
17 hookah have not been studied nearly as extensively as cigarettes, smoking tobacco in a waterpipe  
18 is associated with negative health outcomes similar to those associated with cigarette use. Studies  
19 compare hookah to cigarettes and illustrate that both forms of tobacco use expose smokers to  
20 toxicants associated with cardiovascular and lung disease, including carbon monoxide and  
21 polycyclic aromatic hydrocarbons.[3, 23] Further, hookah use significantly increases one's risk  
22 for lung cancer, respiratory illness, low birthweight and periodontal disease.[24] Lastly,  
23 preliminary research shows hookah use may be associated with nicotine dependence and could  
24 be a gateway drug to cigarette smoking.[3, 25]  
25  
26  
27  
28  
29  
30  
31  
32  
33  
34  
35  
36  
37  
38

39 These negative health consequences of hookah use are compounded by the many  
40 misperceptions and incorrect beliefs and attitudes held by hookah users. Many hookah smokers  
41 underestimate the health risks and addictive properties of hookah use. Contrary to the published  
42 harms of hookah use, college students and young adults believe smoking tobacco in a waterpipe  
43 is less harmful and less addictive than cigarettes and believe they can quit anytime.[26, 27]  
44  
45  
46  
47  
48  
49

50 Similar to other studies, we found that hookah users were more likely than non-hookah  
51 users to engage in substance use (separate from their hookah smoking) such as marijuana,  
52 cigarettes and other psychoactive drugs.[21, 22, 28] Due to the cross-sectional nature of this  
53  
54  
55  
56  
57  
58  
59  
60

1  
2  
3 study, we are unable to determine the temporal sequence of hookah smoking and the use of other  
4  
5 substances. However, it may not be surprising that hookah smokers also engage in other  
6  
7 substance use behaviors. Previous research supports that engagement in one risk behavior is  
8  
9 often associated with an increased likelihood of engaging in other risk behaviors.[29] This may  
10  
11 be especially true for hookah, cigarettes, and marijuana, all different means of smoking. It may  
12  
13 be that once a college student decides to engage in a smoking behavior, they may be open to a  
14  
15 variety of smoking behaviors. Further, given that college students report smoking both tobacco  
16  
17 and marijuana in their hookah and independently as well, these results suggest marijuana  
18  
19 prevention efforts may be effectively paired with tobacco prevention strategies.  
20  
21  
22  
23

24  
25 To the best of our knowledge, this is also the first study to investigate hookah use using  
26  
27 Facebook. Our findings show more than 5% of college student profiles display references to  
28  
29 hookah on Facebook. While hookah references on SNSs have not yet been extensively studied,  
30  
31 other research illustrates that adolescents display references to other risk behaviors such as  
32  
33 alcohol and substance use on their SNS profile.[16] These displays of various risk behaviors may  
34  
35 represent engagement in that behavior, consideration of engagement in the behavior, boastful  
36  
37 claims, or nonsense.[16] College students who display references to intoxication or problem  
38  
39 drinking on their Facebook profile were more likely to meet clinical criteria for problem drinking  
40  
41 compared to those who do not display such references.[30] Additionally, adolescents interpret  
42  
43 alcohol displays on SNSs to be influential and valid representations of alcohol use.[31] Thus,  
44  
45 these displays are meaningful. Given the social nature of hookah smoking, the social dimension  
46  
47 of Facebook may be a salient factor in popularizing hookah use. Since students mainly initiate  
48  
49 and practice hookah use with friends, Facebook may allow them to find such friends. Further  
50  
51 research exploring this idea is necessary.  
52  
53  
54  
55  
56  
57  
58  
59  
60

1  
2  
3  
4  
5  
6  
7  
8  
9  
10  
11  
12  
13  
14  
15  
16  
17  
18  
19  
20  
21  
22  
23  
24  
25  
26  
27  
28  
29  
30  
31  
32  
33  
34  
35  
36  
37  
38  
39  
40

There are several potential limitations to this study. First, participants were recruited from two universities. As cultural factors may be important in understanding hookah use across the US, it is possible that these two universities do not provide a representative sample. However, given our participants were selected from large geographically distinct state universities and that our prevalence estimates are consistent with other studies' estimates, this suggests our sample was representative. Second, we evaluated profiles from only one SNS and participants were limited to those who maintained a public Facebook profile and allowed their phone numbers to be listed either in the university directory or on Facebook. The extent to which findings could be generalized to profiles that have their security set to private, to profiles on other SNSs, or to younger adolescent populations is not known. It is important to note that SNS profile privacy settings are not permanent; profile owners may change their privacy settings at any time or to reflect what security upgrades are offered by Facebook. It is unclear whether profile owners who maintained a private profile at the time of this study would be more likely, or less likely, to display hookah references. Lastly, our findings are also limited in that our study sample included very few minority and no African American participants, which is consistent with the demographic of our universities.

41  
42  
43  
44  
45  
46  
47  
48  
49  
50  
51  
52  
53  
54  
55  
56  
57  
58  
59  
60

Despite these limitations, our findings have important implications. First, this is the first study to illustrate that hookah use goes beyond tobacco. We found that some students also smoke marijuana and hash in their hookah. With this understanding, future prevention and intervention methods may pair existing tobacco and marijuana strategies when targeting college hookah smokers. Second, we found that hookah use is also emerging on Facebook profiles, which may promote the illusion that it is a socially acceptable behavior and safe alternative to cigarettes. Future research is needed to determine whether Facebook may be helpful for

1  
2  
3 screening in clinical settings. Along with a better understanding of how adolescents learn about  
4  
5 hookah, these results may help providers assess college students who are at risk for or are  
6  
7 engaging in hookah use.  
8  
9

### 10 11 12 **WHAT THIS PAPER ADDS**

13  
14  
15 Hookah smoking is a popular alternative form of tobacco use among US college students.  
16  
17 However, patterns of use and characteristics of young hookah smokers remain unclear, as does  
18  
19 why hookah is particularly attractive to this population. This paper adds to our understanding of  
20  
21 hookah use by investigating the prevalence of hookah smoking among college students and by  
22  
23 identifying the predominate substances college students smoke in a hookah, their use of other  
24  
25 substances, and how hookah is displayed on their Facebook profiles. Hookah may present new  
26  
27 risks for nicotine addiction in this population and our results have implications for the content  
28  
29 and perhaps venue of future interventions.  
30  
31  
32  
33  
34  
35

### 36 37 **ACKNOWLEDGEMENTS**

38  
39 The authors would like to thank Hope Villiard and Lauren Kacvinsky for their assistance with  
40  
41 data collection.  
42  
43  
44  
45

### 46 47 **COMPETING INTERESTS**

48  
49 The authors have no competing interests.  
50  
51  
52  
53  
54  
55  
56  
57  
58  
59  
60



## FUNDING

This work was supported by award R211AA017936 from NIAAA as well as award K12HD055894 from the Eunice Kennedy Shriver National Institute of Child Health and Human Development.

## CONTRIBUTORSHIP STATEMENT

As the first author, I, Libby Brockman, contributed to this paper by designing the project, and by acquiring, analyzing and interpreting the data for this study. I also provided statistical expertise and drafted the manuscript. My co-authors contributed as follows: Megan A Pumper actively participated in data collection, and provided technical support as well as a critical revision of the manuscript for important intellectual content. Dimitri A Christakis provided statistical expertise, administrative/technical/material support, and critical revisions of the manuscript for important intellectual content. Megan A Moreno contributed to this paper by providing conception and design efforts, funding, administrative/technical/material support, supervision, and a critical revision of the manuscript for important intellectual content.

## DATA SHARING STATEMENT

We do not have any additional, unpublished data from this study.

## REFERENCES

1. CDC, Centers for Disease Control & Prevention. Trends in current cigarette smoking among high school students and adults, United States, 1965-2010. Centers for Disease Control & Prevention, 2011.
2. Warner KE, Mendez D. Tobacco control policy in developed countries: yesterday, today, and tomorrow. *Nicotine Tob Res* 2010 Sep;12(9):876-887.
3. Maziak W. The global epidemic of waterpipe smoking. *Addict Behav* 2011 2011 Jan-Feb;36(1-2):1-5.
4. World Health Organization Study Group on Tobacco Product Regulation. Advisory note: Waterpipe tobacco smoking: health effects, research needs, and recommended actions by regulators. Geneva, Switzerland: World Health Organization, Tobacco Free Initiative; 2005. Report No.: 9241593857 9789241593854.
5. Kandela P. Nargile smoking keeps Arabs in Wonderland. *Lancet* 2000 Sep;356(9236):1175.
6. Warren CW, Lea V, Lee J, et al. Change in tobacco use among 13-15 year olds between 1999 and 2008: findings from the Global Youth Tobacco Survey. *Glob Health Promot* 2009 Sep;16(2 Suppl):38-90.
7. Ray C. The hookah - the Indian waterpipe. *Current Science* 2009 MAY 25 2009;96(10):1319-1323.
8. Knishkowsky B, Amitai Y. Water-pipe (narghile) smoking: an emerging health risk behavior. *Pediatrics* 2005 Jul;116(1):e113-119.
9. Carroll MV, Shensa A, Primack BA. A comparison of cigarette- and hookah-related videos on YouTube. *Tob Control* 2012 Feb; doi:10.1136/tobaccocontrol-2011-050253.

- 1  
2  
3 10. Gerbner G, Gross L, Morgan M, et al. Living with television: the dynamics of the  
4 cultivation process. In: Bryant J, Zillman D, eds. Perspectives on Media Effects. Hillsdale, NJ:  
5 Lawrence Erlbaum Associates, 1986:17-40.  
6  
7
- 8  
9  
10 11. Lewis K, Kaufman J, Christakis N. The taste for privacy: an analysis of college student  
11 privacy settings in an online social network. Journal of Computer-Mediated Communication  
12 2008;14(1):79-100.  
13  
14
- 15  
16  
17 12. Fogg BJ. Mass interpersonal persuasion: an early view of a new phenomenon. Third  
18 International Conference on Persuasive Technology; 2008; Berlin: Springer; 2008.  
19  
20
- 21  
22 13. Dalton MA, Beach ML, Adachi-Mejia AM, et al. Early exposure to movie smoking  
23 predicts established smoking by older teens and young adults. Pediatrics 2009 Apr;123(4):e551-  
24 558.  
25  
26  
27
- 28  
29 14. Neinstein L, Anderson M. Adolescent Development. In: Neinstein L, ed. Adolescent  
30 Health Care: A Practical Guide. Philadelphia: Lippincott Williams and Wilkins, 2002:767-792.  
31  
32
- 33  
34 15. Strasburger VC, Wilson BJ, Jordan A. Children, Adolescents and the Media. Beverly  
35 Hills: Sage, 2008.  
36  
37
- 38  
39 16. Moreno MA, Parks MR, Zimmerman FJ, et al. Display of health risk behaviors on  
40 MySpace by adolescents: Prevalence and Associations. Archives of Pediatrics and Adolescent  
41 Medicine 2009;163(1):35-41.  
42  
43  
44
- 45  
46 17. Buffardi LE, Campbell WK. Narcissism and social networking Web sites. Pers Soc  
47 Psychol Bull 2008 Oct;34(10):1303-1314.  
48  
49
- 50  
51 18. Moreno MA, Egan KG, Brockman L. Development of a researcher codebook for use in  
52 evaluating social networking site profiles. J Adolesc Health 2011 Jul;49(1):29-35.  
53  
54  
55  
56  
57  
58  
59  
60

- 1  
2  
3 19. Moreno M, Parks M, Zimmerman F, et al. Display of health risk behaviors on MySpace  
4  
5 by adolescents: prevalence and associations. *Arch Pediatr Adolesc Med* 2009 Jan;163(1):27-34.  
6  
7
- 8 20. American College Health Association. National College Health Assessment II: Reference  
9  
10 Group Executive Summary, Spring 2011. Hanover, MD: American College Health Association,  
11  
12 2011.  
13
- 14 21. Dugas E, Tremblay M, Low NC, et al. Water-pipe smoking among North American  
15  
16 youths. *Pediatrics* 2010 Jun;125(6):1184-1189.  
17  
18
- 19 22. Eissenberg T, Ward KD, Smith-Simone S, et al. Waterpipe tobacco smoking on a U.S.  
20  
21 College campus: prevalence and correlates. *J Adolesc Health* 2008 May;42(5):526-529.  
22  
23
- 24 23. Shihadeh A, Saleh R. Polycyclic aromatic hydrocarbons, carbon monoxide, "tar", and  
25  
26 nicotine in the mainstream smoke aerosol of the narghile water pipe. *Food Chem Toxicol* 2005  
27  
28 May;43(5):655-661.  
29  
30
- 31 24. Akl EA, Gaddam S, Gunukula SK, et al. The effects of waterpipe tobacco smoking on  
32  
33 health outcomes: a systematic review. *Int J Epidemiol* 2010 Jun;39(3):834-857.  
34  
35
- 36 25. Jensen PD, Cortes R, Engholm G, et al. Waterpipe use predicts progression to regular  
37  
38 cigarette smoking among Danish youth. *Subst Use Misuse* 2010 Jun;45(7-8):1245-1261.  
39  
40
- 41 26. Smith-Simone S, Maziak W, Ward KD, et al. Waterpipe tobacco smoking: knowledge,  
42  
43 attitudes, beliefs, and behavior in two U.S. samples. *Nicotine Tob Res* 2008 Feb;10(2):393-398.  
44  
45
- 46 27. Smith SY, Curbow B, Stillman FA. Harm perception of nicotine products in college  
47  
48 freshmen. *Nicotine Tob Res* 2007 Sep;9(9):977-982.  
49  
50
- 51 28. Sutfin EL, McCoy TP, Reboussin BA, et al. Prevalence and correlates of waterpipe  
52  
53 tobacco smoking by college students in North Carolina. *Drug Alcohol Depend* 2011 May;115(1-  
54  
55 2):131-136.  
56  
57  
58  
59  
60

- 1  
2  
3 29. Fox HB, McManus MA, Arnold KN. Fact Sheet No. 8: Significant multiple risk  
4 behaviors among U.S. high school students. Washington, DC: The National Alliance to Advance  
5 Adolescent Health; 2010.  
6  
7  
8  
9  
10 30. Moreno MA, Christakis DA, Egan KG, et al. Associations between displayed alcohol  
11 references on facebook and problem drinking among college students. Arch Pediatr Adolesc  
12 Med 2011 Oct.  
13  
14  
15  
16  
17 31. Moreno MA, Briner LR, Williams A, et al. Real use or "real cool": adolescents speak out  
18 about displayed alcohol references on social networking websites. J Adolesc Health 2009  
19 Oct;45(4):420-422.  
20  
21  
22  
23  
24  
25  
26  
27  
28  
29  
30  
31  
32  
33  
34  
35  
36  
37  
38  
39  
40  
41  
42  
43  
44  
45  
46  
47  
48  
49  
50  
51  
52  
53  
54  
55  
56  
57  
58  
59  
60

STROBE Statement—Checklist of items that should be included in reports of *cross-sectional studies*

|                              | Item No | Recommendation                                                                                                                                                                                                                                                                                                                                                                                                |
|------------------------------|---------|---------------------------------------------------------------------------------------------------------------------------------------------------------------------------------------------------------------------------------------------------------------------------------------------------------------------------------------------------------------------------------------------------------------|
| <b>Title and abstract</b>    | 1       | (a) Indicate the study's design with a commonly used term in the title or the abstract<br>(b) Provide in the abstract an informative and balanced summary of what was done and what was found                                                                                                                                                                                                                 |
| <b>Introduction</b>          |         |                                                                                                                                                                                                                                                                                                                                                                                                               |
| Background/rationale         | 2       | Explain the scientific background and rationale for the investigation being reported                                                                                                                                                                                                                                                                                                                          |
| Objectives                   | 3       | State specific objectives, including any prespecified hypotheses                                                                                                                                                                                                                                                                                                                                              |
| <b>Methods</b>               |         |                                                                                                                                                                                                                                                                                                                                                                                                               |
| Study design                 | 4       | Present key elements of study design early in the paper                                                                                                                                                                                                                                                                                                                                                       |
| Setting                      | 5       | Describe the setting, locations, and relevant dates, including periods of recruitment, exposure, follow-up, and data collection                                                                                                                                                                                                                                                                               |
| Participants                 | 6       | (a) Give the eligibility criteria, and the sources and methods of selection of participants                                                                                                                                                                                                                                                                                                                   |
| Variables                    | 7       | Clearly define all outcomes, exposures, predictors, potential confounders, and effect modifiers. Give diagnostic criteria, if applicable                                                                                                                                                                                                                                                                      |
| Data sources/<br>measurement | 8*      | For each variable of interest, give sources of data and details of methods of assessment (measurement). Describe comparability of assessment methods if there is more than one group                                                                                                                                                                                                                          |
| Bias                         | 9       | Describe any efforts to address potential sources of bias                                                                                                                                                                                                                                                                                                                                                     |
| Study size                   | 10      | Explain how the study size was arrived at                                                                                                                                                                                                                                                                                                                                                                     |
| Quantitative variables       | 11      | Explain how quantitative variables were handled in the analyses. If applicable, describe which groupings were chosen and why                                                                                                                                                                                                                                                                                  |
| Statistical methods          | 12      | (a) Describe all statistical methods, including those used to control for confounding<br>(b) Describe any methods used to examine subgroups and interactions<br>(c) Explain how missing data were addressed<br>(d) If applicable, describe analytical methods taking account of sampling strategy<br>(e) Describe any sensitivity analyses                                                                    |
| <b>Results</b>               |         |                                                                                                                                                                                                                                                                                                                                                                                                               |
| Participants                 | 13*     | (a) Report numbers of individuals at each stage of study—eg numbers potentially eligible, examined for eligibility, confirmed eligible, included in the study, completing follow-up, and analysed<br>(b) Give reasons for non-participation at each stage<br>(c) Consider use of a flow diagram                                                                                                               |
| Descriptive data             | 14*     | (a) Give characteristics of study participants (eg demographic, clinical, social) and information on exposures and potential confounders<br>(b) Indicate number of participants with missing data for each variable of interest                                                                                                                                                                               |
| Outcome data                 | 15*     | Report numbers of outcome events or summary measures                                                                                                                                                                                                                                                                                                                                                          |
| Main results                 | 16      | (a) Give unadjusted estimates and, if applicable, confounder-adjusted estimates and their precision (eg, 95% confidence interval). Make clear which confounders were adjusted for and why they were included<br>(b) Report category boundaries when continuous variables were categorized<br>(c) If relevant, consider translating estimates of relative risk into absolute risk for a meaningful time period |
| Other analyses               | 17      | Report other analyses done—eg analyses of subgroups and interactions, and sensitivity analyses                                                                                                                                                                                                                                                                                                                |

| <b>Discussion</b>        |    |                                                                                                                                                                            |
|--------------------------|----|----------------------------------------------------------------------------------------------------------------------------------------------------------------------------|
| Key results              | 18 | Summarise key results with reference to study objectives                                                                                                                   |
| Limitations              | 19 | Discuss limitations of the study, taking into account sources of potential bias or imprecision. Discuss both direction and magnitude of any potential bias                 |
| Interpretation           | 20 | Give a cautious overall interpretation of results considering objectives, limitations, multiplicity of analyses, results from similar studies, and other relevant evidence |
| Generalisability         | 21 | Discuss the generalisability (external validity) of the study results                                                                                                      |
| <b>Other information</b> |    |                                                                                                                                                                            |
| Funding                  | 22 | Give the source of funding and the role of the funders for the present study and, if applicable, for the original study on which the present article is based              |

\*Give information separately for exposed and unexposed groups.

**Note:** An Explanation and Elaboration article discusses each checklist item and gives methodological background and published examples of transparent reporting. The STROBE checklist is best used in conjunction with this article (freely available on the Web sites of PLoS Medicine at <http://www.plosmedicine.org/>, Annals of Internal Medicine at <http://www.annals.org/>, and Epidemiology at <http://www.epidem.com/>). Information on the STROBE Initiative is available at [www.strobe-statement.org](http://www.strobe-statement.org).

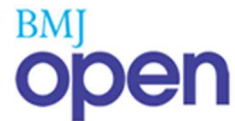

**Hookah's New Popularity Among US College Students: A Pilot Study of the Characteristics of Hookah Smokers and Their Facebook Displays**

|                                 |                                                                                                                                                                                                                                                                                                                                      |
|---------------------------------|--------------------------------------------------------------------------------------------------------------------------------------------------------------------------------------------------------------------------------------------------------------------------------------------------------------------------------------|
| Journal:                        | <i>BMJ Open</i>                                                                                                                                                                                                                                                                                                                      |
| Manuscript ID:                  | bmjopen-2012-001709.R1                                                                                                                                                                                                                                                                                                               |
| Article Type:                   | Research                                                                                                                                                                                                                                                                                                                             |
| Date Submitted by the Author:   | 25-Oct-2012                                                                                                                                                                                                                                                                                                                          |
| Complete List of Authors:       | Brockman, Libby; Seattle Children's Research Institute, Center for Child Health Behavior and Development<br>Pumper, Megan; University of Wisconsin-Madison, Pediatrics<br>Christakis, Dimitri; Seattle Children's Research Institute, Center for Child Health Behavior<br>Moreno, Megan; University of Wisconsin-Madison, Pediatrics |
| <b>Primary Subject Heading</b>: | Smoking and tobacco                                                                                                                                                                                                                                                                                                                  |
| Secondary Subject Heading:      | Public health, Addiction                                                                                                                                                                                                                                                                                                             |
| Keywords:                       | Non-accidental injury < PAEDIATRICS, PUBLIC HEALTH, PAEDIATRICS                                                                                                                                                                                                                                                                      |
|                                 |                                                                                                                                                                                                                                                                                                                                      |

SCHOLARONE™  
Manuscripts



1  
2  
3  
4  
5  
6  
7  
8  
9  
10  
11  
12  
13  
14  
15  
16  
17  
18  
19  
20  
21  
22  
23  
24  
25  
26  
27  
28  
29  
30  
31  
32  
33  
34  
35  
36  
37  
38  
39  
40  
41  
42  
43  
44  
45  
46  
47  
48  
49  
50  
51  
52  
53  
54  
55  
56  
57  
58  
59  
60

## Hookah's New Popularity Among US College Students: A Pilot Study of The Characteristics of Hookah Smokers and Their Facebook Displays

Libby N Brockman<sup>1,2</sup>, Megan A Pumper<sup>3</sup>, Dimitri A Christakis, MD, MPH<sup>1,2</sup>, Megan A Moreno,  
MD, MEd, MPH<sup>3</sup>

<sup>1</sup>Center for Child Health Behavior and Development, Seattle Children's Research Institute,  
Seattle, WA USA, <sup>2</sup>School of Public Health, University of Washington, Seattle, WA USA,

<sup>3</sup>Department of Pediatrics, University of Wisconsin, Madison, WI USA

### CORRESPONDING AUTHOR:

Libby N Brockman

Seattle Children's Research Institute

Center for Child Health Behavior and Development

M/S CW8-6, PO Box 5371; Seattle, WA 98145

Libby.brockman@seattlechildrens.org

Work: 206-884-5074, Fax: 206-884-7801

**Keywords:** Hookah, tobacco, smoking, college students, social networking website

Word Count: 3,502

**ABSTRACT**

**Objectives:** (1) To confirm the prevalence of hookah use among US college students. (2) To identify substances commonly smoked in hookahs and other substance use characteristics of hookah smokers. (3) Given the powerful influence of Facebook and its potential role in promoting behaviors, to assess the prevalence of hookah references on Facebook profiles.

**Design:** Cross sectional study.

**Setting:** Two large US universities; www.Facebook.com.

**Participants:** 307 Facebook profiles were coded and 216 of these profile owners completed an online survey. On average, participants were 18.8 years old (SD=0.7), female (54%), Caucasian (70.4%), and approximately half were from each university.

**Outcome measures:** Lifetime and frequency of hookah use, substance smoked in hookah, cigarette and marijuana use, hookah references displayed on Facebook.

**Results:** 27.8% of participants endorsed hookah use; there were no significant differences between age, gender, race, or university for hookah use. Hookah users reported smoking tobacco (78%), hash (12%) and both tobacco and marijuana/hash (10%) in their hookah. Compared to non-hookah smokers, hookah smokers were more likely to report using cigarettes (OR=3.41,95%CI=1.2-9.64) and marijuana (OR=15.01,95%CI= 6.5-34.65). Hookah references were present on 5% of Facebook profiles.

**Conclusions:** More than one quarter of college students smoke hookah. Most smoke tobacco in their hookah, and hookah smoking is associated with polysubstance use. Some hookah users reference this this behavior on Facebook. Hookah may present new risks for nicotine addiction in this population.

## INTRODUCTION

Tobacco use is the leading preventable cause of morbidity and mortality worldwide. Encouragingly, public health efforts have successfully decreased the prevalence of cigarette smoking in the US by half over the past 45 years.[1] This achievement is attributed to the first Surgeon General's report on smoking and health in 1964, taxation, indoor smoking bans, media advertising restrictions and counter-advertising campaigns, and increased public awareness of the harms associated with cigarette smoking.[2]

Despite this laudable public health accomplishment, the use of alternative forms of tobacco is currently rising, threatening these successful efforts. Of particular concern is the increasing popularity of hookah.[3] Hookah use, also known as shisha, narghile and waterpipe, is defined as the smoking of substances through a waterpipe such that the smoke passes through water and is cooled prior to inhalation. Smoking a waterpipe is a tradition dating back at least four centuries to origins in northern Africa and southwest Asia.[4] Until recently, smoking in this fashion remained primarily a tradition observed in Middle Eastern countries, most popular among adult men.[5]

Presently, hookah smoking is becoming an increasingly popular form of tobacco use worldwide. Spreading from the Eastern Mediterranean region, hookah use is now common in Western countries including Australia, the United Kingdom, Canada and the United States.[3] Further, hookah is becoming increasingly popular among youth. A recent global surveillance study examining time trends (1999-2008) of tobacco use in youth found an increase in hookah smoking amongst teens as young as 13-15 year olds.[3 6] In the United States, adolescents and young adults are at the forefront of this resurgence.

1  
2  
3 The understanding of hookah smoking patterns among youth remains incomplete.  
4  
5 Current estimates suggest 15-41% of undergraduate college students smoke hookah.[7-11]  
6  
7  
8 However, while hashish or opium were once smoked in hookahs in the Middle East and India,[5  
9  
10 12] smoking tobacco in hookahs was popularized in the 1990s with the introduction of *maasel*, a  
11  
12 sweetened and flavored tobacco product.[3] Some reports suggest marijuana, hashish or other  
13  
14 drugs are sometimes added to hookah tobacco.[13] However, the predominate substances  
15  
16 smoked in hookahs and other substance use practices of hookah users among US teens remain  
17  
18 unknown.  
19  
20  
21

22 Therefore, the primary purpose of this pilot study was to confirm the lifetime prevalence  
23  
24 of hookah smoking amongst undergraduate students at two large public universities in different  
25  
26 regions of the US. The second aim of this study was to identify the specific substance use  
27  
28 practices of hookah smokers, including the predominant substance that young adults smoke in  
29  
30 their hookah, and other substance use characteristics of hookah smokers. Identifying these  
31  
32 characteristics of hookah smokers has numerous public health and clinical implications, and is a  
33  
34 necessary step in developing targeted prevention and intervention strategies.  
35  
36  
37  
38

39 Finally, how and why hookah smoking is gaining popularity among young adults also  
40  
41 remains unclear. Many attribute hookah's popularity to its social nature; hookah use is a shared,  
42  
43 communal experience and two or more people often share a single waterpipe.[4 6] It is also  
44  
45 possible that new forms of media are playing a role in promoting hookah smoking among young  
46  
47 adults. Recent work suggests hookah-related videos on YouTube, compared to cigarette-related  
48  
49 videos, are less likely to reference the harmful consequences of smoking nor provide anti-  
50  
51 smoking messages.[14] As the cultivation theory suggests, online videos may influence viewers'  
52  
53  
54  
55  
56  
57  
58  
59  
60

1  
2  
3 opinions and perceptions; videos that fail to portray the negative consequences of hookah  
4  
5 smoking may serve to promote this behavior among young adults.[15]  
6  
7

8 The authors hypothesize that social networking websites (SNSs) may also popularize  
9  
10 hookah smoking by serving as a venue in which young adults learn about and promote hookah  
11  
12 use among their social groups. In recent years, SNSs such as Facebook, have become a  
13  
14 tremendously popular source of social media among adolescents and young adults; Facebook is  
15  
16 now used by over 90% of college students and is the most popular SNS among university  
17  
18 students.[16] While previous studies have found associations between consuming media, such as  
19  
20 television and movies, depicting tobacco and the initiation of tobacco use, it has been argued that  
21  
22 Facebook may have greater influence than traditional media because Facebook combines the  
23  
24 power of interpersonal persuasion with the reach of mass media. [17 18] Specifically for  
25  
26 adolescents and young adults, for whom peers are the most important source of influence, the  
27  
28 power of interpersonal persuasion cannot be underestimated.[19] Some suggest these websites  
29  
30 may serve as a media “super-peer” by promoting norms of behavior among adolescents.[20]  
31  
32 Additionally, social learning theory predicts that adolescents observe, imitate, and model  
33  
34 behaviors they see in their peers.  
35  
36  
37  
38  
39

40 Thus, the third objective of this study was to conduct a pilot investigation of the presence  
41  
42 of hookah references on Facebook. As a social networking site, Facebook may provide a venue  
43  
44 for peer interaction and social networking, both of which are recognized as contributors to risk  
45  
46 behaviors.[21] Risk behaviors such as alcohol and drug use have been found to be displayed on  
47  
48 SNS profiles.[21] It is therefore possible that hookah is also displayed online within social  
49  
50 networks, but the extent to which this is so remains unknown.  
51  
52  
53  
54  
55  
56  
57  
58  
59  
60

## METHODS

This study was conducted between September 2009 and December 2011 and received IRB approval from both the University of Wisconsin and the University of Washington.

### Setting

Participants for this study attended one of two large, public universities, in the Midwest and on the West Coast. Participants were recruited via the social networking website Facebook (www.Facebook.com). This SNS was selected because it is the most popular SNS among the target population of college students.[22]

### Subject selection

The Facebook search engine was used to identify random public profiles registered within either university network that listed a graduation year indicating the profile owner was a freshman, sophomore or junior student. Inclusion criteria required profile owners to report an age on their profile between 18 and 20 years and to show evidence of profile activity within the last 30 days.

In order to reach a target survey sample size of 200 participants, a total of 307 eligible Facebook profiles were identified in 2009 and 2010 and invited to participate in the study. All profiles returned in the search results were assessed sequentially for eligibility until the target sample size was reached. Profiles were excluded if they did not meet search criteria (ie, incorrectly listed), including those who were not undergraduates (N=448), did not meet the age criteria (N=313) or did not display their age (N=49). Profiles were also excluded if their profiles were completely private, had any one of the following sections set to private: information section, wall or photographs (N=1630), or if the profile owner was not reachable for recruitment

1  
2  
3 (ie, no phone number or email listed on Facebook profile or in the university directory) (N=303).  
4  
5

6 Demographic data was recorded from eligible profiles.  
7

## 8 **Recruitment**

9

10 The 307 profile owners with profiles that met inclusion criteria were called on the phone.  
11  
12 The phone call served two purposes. First, profile owners identity and age were verified. Second,  
13 eligible students were then recruited to participate in the online survey. Survey invites were only  
14 sent to profile owners whose identity could be confirmed over the phone. The study was  
15 explained to the profile owner and permission was requested to send an email that contained  
16 further information about the study. If the participant consented to receive the email, an email  
17 was sent that provided detailed information about the study as well as a link to an online survey.  
18  
19 The survey was administered online via a Catalyst WebQ online survey engine. Survey  
20 respondents were provided a \$15 iTunes gift card as compensation.  
21  
22  
23  
24  
25  
26  
27  
28  
29  
30

## 31 **Survey**

32

33  
34 The online survey evaluated hookah use. Participants were asked about their lifetime  
35 experience using hookah. Those who reported ever using hookah were also questioned about  
36 their frequency of use; answer options included never, monthly or less, 2-4 times a month, 2-3  
37 times a week, 4 or more times a week. Participants were also asked what substances they  
38 typically smoked in their hookah; answer options included tobacco, marijuana, hash, a mix of  
39 marijuana/hash and tobacco. All participants were also questioned about their lifetime experience  
40 and frequency of use of marijuana and cigarettes, with similar answer options for frequency as  
41 described above.  
42  
43  
44  
45  
46  
47  
48  
49  
50  
51

## 52 **Facebook Profile Coding**

53  
54  
55  
56  
57  
58  
59  
60

1  
2  
3 To investigate the presence of hookah references on college student's Facebook profiles, all  
4  
5 307 profiles were evaluated once by one of three trained coders using a research codebook. This  
6  
7 codebook has been previously used to evaluating the display of other health risk behavior  
8  
9 references on SNS profiles such as alcohol and violence.[23 24] The codebook was adapted for  
10  
11 this to code for references to hookah. In order to determine whether hookah references were  
12  
13 present, coders viewed all publicly accessible elements of the Facebook profile including profile  
14  
15 owners' tagged pictures, profile pictures, information sections, and their Wall. Both images and  
16  
17 text were coded and hookah reference data included the coder's typewritten description of any  
18  
19 image references or verbatim text from profiles usually found in the form of status updates or in  
20  
21 info section. If present, identifiable information was removed from text references. One year of  
22  
23 profile data was assessed for each participant, starting from the date of evaluation and going back  
24  
25 to the same date, one year prior.  
26  
27  
28  
29  
30

31  
32 Profiles were categorized into one of two groups. Profiles with one or more references to  
33  
34 hookah use were classified as hookah "Displayers". Example references included personal  
35  
36 photographs in which the profile owner was smoking a hookah, or text references describing  
37  
38 smoking hookah. Only photographs that contained the profile owner with a clearly identifiable  
39  
40 hookah and text references that explicitly mentioned the word hookah or a synonym of hookah,  
41  
42 such as shisha or narghile, were coded. Profiles without any hookah references were considered  
43  
44 "Non-Displayers".  
45  
46  
47

48 Because of infrequent references to hookah on Facebook, interater agreement was uses to  
49  
50 assess coder reliability. A 20% random subsample of profiles was evaluated by all three coders  
51  
52 and 96% interrater reliability was achieved.  
53  
54

## 55 **Analysis**

56  
57  
58  
59  
60



Demographic characteristics, frequency and prevalence of hookah use, and Facebook displays of hookah were summarized using descriptive statistics. Bivariate logistic regression was used to examine covariates of lifetime hookah use (outcome); odds ratios and their 95% confidence intervals were obtained for independent variables including age, gender, race/ethnicity, university, and substance use. A multivariate model of lifetime hookah use was also fit, including the covariates of age, gender, race/ethnicity, university, and substance use. Bivariate comparisons between demographic characteristics and hookah Displayer/Non-Displayer groups were conducted using Fisher's exact tests and Chi squared tests. All statistical analyses were conducted using STATA version 11.0 (Statacorp, College Station, TX). A two-sided p-value  $p < 0.05$  was considered statistically significant.

## RESULTS

### Subjects

A total of 307 Facebook profiles were coded; 216 (70% response rate) of these individuals completed all survey questions with viable answers and were included in the analyses. Participants had an average age of 18.8 years (SD 0.7), were 54.2% female and 70.4% Caucasian. Approximately half of participants were from each university. See Table 1 for further details. (Table 1)

**Table 1. Descriptive characteristics of survey respondents (n=216)**

| Variable              | Percent (n)       |                          |                     |
|-----------------------|-------------------|--------------------------|---------------------|
|                       | Total             | Hookah Non-Users (n=153) | Hookah Users (n=60) |
| Age (yr) <sup>a</sup> |                   |                          |                     |
| 18                    | 35.7% (77)        | 36.5% (57)               | 33.3% (20)          |
| 19                    | 50.9% (110) (110) | 48.1% (75)               | 58.3% (35)          |
| 20                    | 13.4% (29)        | 15.4% (24)               | 8.33% (5)           |
| Gender                |                   |                          |                     |
| Male                  | 47.2% (102)       | 45.5% (71)               | 51.7% (31)          |

|                                                  |             |             |            |
|--------------------------------------------------|-------------|-------------|------------|
| Female                                           | 52.8% (114) | 54.5% (85)  | 48.3% (29) |
| State                                            |             |             |            |
| Washington                                       | 46.8% (101) | 47.4% (74)  | 45.0% (27) |
| Wisconsin                                        | 53.2% (115) | 52.6% (82)  | 55.0% (33) |
| Race/Ethnicity <sup>b</sup>                      |             |             |            |
| Caucasian                                        | 70.4% (150) | 68.0% (104) | 76.7% (46) |
| African American                                 | 0%          | 0%          | 0%         |
| Asian/Pacific Islander                           | 18.8% (40)  | 20.9% (32)  | 13.3% (8)  |
| Hispanic                                         | 2.3% (5)    | 2.6% (4)    | 1.7% (1)   |
| Other/Multiracial                                | 8.5% (18)   | 8.5% (13)   | 8.3% (5)   |
| <sup>a</sup> Overall mean (SD), 18.8 (0.7) years |             |             |            |
| <sup>b</sup> 3 missing values                    |             |             |            |

## Survey Results

### *Prevalence of hookah use*

Lifetime hookah use was reported by 27.8% (N=60) of participants (Table 2).

Participants who reported ever using hookah were on average 18.8 (SD 0.6) years of age, and tended to be male (51.7%) and White (76.7%) (Table 1). There were no significant differences between age, gender, race, or university for hookah use. Of those who reported ever smoking hookah, 78.3% smoked hookah monthly or less and 21.6% were current users who reported smoking hookah more than once per month.

**Table 2. Survey Results: Endorsement of Substance Use**

| Variable                      | Percent (n) |                               |                           |
|-------------------------------|-------------|-------------------------------|---------------------------|
|                               | Total       | Hookah Non-Users <sup>a</sup> | Hookah Users <sup>b</sup> |
| Hookah                        | 27.8% (60)  | 0%                            | 100% (60)                 |
| Cigarettes                    | 16.2% (35)  | 7.1% (11)                     | 40% (24)                  |
| Marijuana <sup>c</sup>        | 30.7% (66)  | 13.6% (21)                    | 75% (45)                  |
| <sup>a</sup> N=156            |             |                               |                           |
| <sup>b</sup> N=60             |             |                               |                           |
| <sup>c</sup> 3 missing values |             |                               |                           |

### *Substances smoked in the hookah*

More than three-quarters (78%) of those who reported ever smoking hookah reported primarily smoking tobacco in their hookah. Only 12% reported smoking only hash in their hookah, while 10%

reported smoking both marijuana/hash and tobacco in their hookah. A total of 22% reported using a hookah to smoke marijuana.

### *Hookah users engagement with other substances*

Of those who reported ever using hookah, 40% reported ever smoking cigarettes, of whom 42.7% reported smoking cigarettes more than once a month. Most (75%) hookah users reported ever using marijuana, of whom 51% reported using marijuana more than once per month. No hookah users endorsed cigarette use only; all hookah smokers who smoked cigarettes also smoked marijuana. (Table 3)

**Table 3. Survey Results: Endorsement of Substance Use by Hookah Use**

| Variable                              | Percent (n)     |                |                        |           |
|---------------------------------------|-----------------|----------------|------------------------|-----------|
|                                       | Cigarettes only | Marijuana only | Cigarettes & Marijuana | None      |
| Hookah Users (N=60)                   | 0               | 35% (21)       | 40% (24)               | 25% (15)  |
| Hookah Non Users (N=155) <sup>a</sup> | 4.5% (7)        | 11% (17)       | 2.5% (4)               | 82% (127) |

<sup>a</sup> 1 missing value

Multivariate modeling of lifetime hookah use indicated that those who endorsed hookah use were more likely to report other substance use. Hookah users were more likely to use cigarettes (OR=3.41,  $p<0.05$ ) and marijuana (OR=15.01,  $p<0.001$ ) compared to non-hookah smokers. (Table 4)

**Table 4. Multivariate logistic regression modeling of lifetime hookah use (n=216)**

| Variable               | Unadjusted OR (95% CI) | Adjusted OR* (95% CI) |
|------------------------|------------------------|-----------------------|
| <b>Age</b>             | 0.92 (0.58-1.44)       | 0.86 (0.47-1.57)      |
| <b>Gender</b>          | 0.78 (0.43-1.42)       | 1.22 (0.55-2.70)      |
| <b>Race</b>            |                        |                       |
| Caucasian              | Reference group        | Reference group       |
| Asian/Pacific Islander | 0.57 (0.24-1.32)       | 0.59 (0.18-1.99)      |
| Hispanic               | 0.57 (0.60-5.20)       | 0.19 (.02-2.45)       |
| Other/Multiracial      | 0.87 (0.29-2.58)       | 2.25 (0.58-8.75)      |

|                                                                  |                    |                      |
|------------------------------------------------------------------|--------------------|----------------------|
| University                                                       | 1.1 (0.61-2.00)    | 0.95 (0.40-2.26)     |
| Cigarettes                                                       | 8.79 (3.94-19.59)  | 3.41 (1.20-9.64)**   |
| Marijuana                                                        | 19.14 (9.10-40.27) | 15.01 (6.50-34.65)** |
| * Odds ratios were adjusted for all other variables in the table |                    |                      |
| ** $p < 0.05$                                                    |                    |                      |

## Facebook results

Hookah references were present on 5.3% of Facebook profiles. There were no significant differences in hookah display between gender, race, or university. Examples of hookah references included personal images of profile owners smoking a hookah, downloaded images of icons saying “ I ♥ HOOKAH”, or status updates such as “Tonight is a hookah type of night, I love nights like these” and “Skippin’ class all day, goin’ hookah shopping, fun!”

## DISCUSSION

This study explored characteristics of college student hookah smokers and evaluated the presence of hookah references displayed on university students’ public Facebook pages. More than one quarter of college students reported smoking hookah and this prevalence estimate is consistent with the national estimate of hookah use among young adults enrolled in college.[25] To the author’s knowledge, this is the first study to survey college students about what substances they smoke in their hookah. The majority of hookah smokers reported smoking tobacco in their hookah, yet more than 20% reported experience with using marijuana or hash in their hookah. These findings support the rising popularity and diversity of hookah use among young adults in the US.

The finding that so many college students are smoking hookah, and specifically smoking tobacco in their hookah, is cause for clinical and public health concern. Although the health effects of hookah have not been studied nearly as extensively as cigarettes, smoking tobacco in a

1  
2  
3 waterpipe is associated with negative health outcomes similar to those associated with cigarette  
4 use. Studies compare hookah to cigarettes and illustrate that both forms of tobacco use expose  
5 smokers to toxicants associated with cardiovascular and lung disease, including carbon  
6  
7  
8  
9  
10  
11  
12  
13  
14  
15  
16  
17  
18  
19  
20  
21  
22  
23  
24  
25  
26  
27  
28  
29  
30  
31  
32  
33  
34  
35  
36  
37  
38  
39  
40  
41  
42  
43  
44  
45  
46  
47  
48  
49  
50  
51  
52  
53  
54  
55  
56  
57  
58  
59  
60

waterpipe is associated with negative health outcomes similar to those associated with cigarette use. Studies compare hookah to cigarettes and illustrate that both forms of tobacco use expose smokers to toxicants associated with cardiovascular and lung disease, including carbon monoxide and polycyclic aromatic hydrocarbons.[3 26] Further, hookah use significantly increases one's risk for lung cancer, respiratory illness, low birthweight and periodontal disease.[27] Lastly, preliminary research shows hookah use may be associated with nicotine dependence and could be a gateway drug to cigarette smoking.[3 28]

These negative health consequences of hookah use are compounded by the many misperceptions and incorrect beliefs and attitudes held by hookah users. Many hookah smokers underestimate the health risks and addictive properties of hookah use. Contrary to the published harms of hookah use, college students and young adults believe smoking tobacco in a waterpipe is less harmful and less addictive than cigarettes and believe they can quit anytime.[29 30]

Similar to other studies, the results of this study suggest that hookah users were more likely than non-hookah users to engage in substance use (separate from their hookah smoking) such as marijuana, cigarettes and other psychoactive drugs.[10 31 32] Due to the cross-sectional nature of this study, it is impossible to determine the temporal sequence of hookah smoking and the use of other substances. However, it may not be surprising that hookah smokers also engage in other substance use behaviors. Previous research supports that engagement in one risk behavior is often associated with an increased likelihood of engaging in other risk behaviors.[33] This may be especially true for hookah, cigarettes, and marijuana, all different means of smoking. It may be that once a college student decides to engage in a smoking behavior, they may be open to a variety of smoking behaviors. These results suggest hookah prevention efforts may be paired with other substance use and general smoking prevention strategies.

1  
2  
3 The findings that one in five hookah smokers smoke marijuana in their hookah and that  
4 hookah smokers are more likely to smoke marijuana separately compared to non-hookah  
5 smokers, are important for two reasons. First, given that many college students maintain that  
6 hookah smoking is a safe alternative to cigarette smoking and that hookah smoking doesn't  
7 constitute "smoking",<sup>[11]</sup> it is possible that these young adults differentiate between methods of  
8 tobacco use. Similarly, college students may have altered perceptions of the safety of smoking  
9 marijuana in a hookah. Second, given the integration of hookah smoking into the social scene on  
10 college campuses<sup>[11]</sup>, it is possible that marijuana may also experience a sort of social  
11 promotion when associated with hookah. This may have implications for intervention strategies  
12 and further work is needed to explore these ideas.  
13  
14  
15  
16  
17  
18  
19  
20  
21  
22  
23  
24  
25  
26

27 To the best of the authors' knowledge, this is also the first study to investigate hookah  
28 use using Facebook. These findings show more than 5% of college student profiles display  
29 references to hookah on Facebook. While this percentage does not compare with the prevalence  
30 of smoking hookah, hookah references on SNSs have not yet been extensively studied. Other  
31 work illustrates that adolescents display references to other risk behaviors such as alcohol and  
32 substance use on their SNS profile.<sup>[21]</sup> These displays of various risk behaviors may represent  
33 engagement in that behavior, consideration of engagement in the behavior, boastful claims, or  
34 nonsense.<sup>[21]</sup> College students who display references to intoxication or problem drinking on  
35 their Facebook profile were more likely to meet clinical criteria for problem drinking compared  
36 to those who do not display such references.<sup>[34]</sup> Additionally, adolescents interpret alcohol  
37 displays on SNSs to be influential and valid representations of alcohol use.<sup>[35]</sup> Thus, these  
38 displays are meaningful. Given the social nature of hookah smoking, the social dimension of  
39 Facebook may be a salient factor in popularizing hookah use. Since students mainly initiate and  
40  
41  
42  
43  
44  
45  
46  
47  
48  
49  
50  
51  
52  
53  
54  
55  
56  
57  
58  
59  
60

1  
2  
3 practice hookah use with friends, Facebook may allow them to find such friends. Further  
4  
5 research exploring the presence and meaning of specifically hookah displays on Facebook  
6  
7 profiles is necessary.  
8  
9

10  
11 There are several potential limitations to this study. First, participants were recruited from  
12  
13 only two universities and the study sample included very few minority and no African American  
14  
15 participants. While the study sample is demographically representative of the student population  
16  
17 at the two selected universities, it is possible that these two universities do not provide a  
18  
19 representative sample of the US college population. The literature suggests that after students of  
20  
21 Arab descent, Caucasian students, followed by Asian students have the highest reported  
22  
23 prevalence rates of smoking hookah.[11] Therefore, given that the participants were selected  
24  
25 from large geographically distinct state universities and that these prevalence estimates are  
26  
27 consistent with other studies' estimates, this suggests the results may be generalizable to the US  
28  
29 college population. Second, only profiles from one SNS were evaluated and participants were  
30  
31 limited to those who maintained a public Facebook profile and allowed their phone numbers to  
32  
33 be listed in either the university directory or on Facebook. The extent to which findings could be  
34  
35 generalized to profiles that have their security set to private, to profiles on other SNSs, or to  
36  
37 younger adolescent populations is not known. It is important to note that SNS profile privacy  
38  
39 settings are not permanent; profile owners may change their privacy settings at any time or to  
40  
41 reflect what security upgrades are offered by Facebook. It is unclear whether profile owners who  
42  
43 maintained a private profile at the time of this study would be more likely, or less likely, to  
44  
45 display hookah references. Lastly, the cross-sectional design of this study precluded determining  
46  
47 the temporal sequence of smoking hookah and engagement in other substance use. Future  
48  
49  
50  
51  
52  
53  
54  
55  
56  
57  
58  
59  
60





## ARTICLE SUMMARY

### Article Focus:

- To confirm the prevalence of hookah use among US college students
- To identify characteristics of US college student smokers, including substances typically smoked in a hookah
- To determine the prevalence of hookah references on Facebook profiles belonging to US college students

### Key Messages:

- Hookah smoking is becoming increasingly popular and more than 25% of college students smoke hookah.
- Hookah smoking is significantly associated with cigarette and marijuana use, and some college students smoke marijuana in their hookah.
- Some college students reference hookah on their Facebook profiles.

### Strengths and Limitations of this study:

- This is the first study to examine what substances college hookah smokers use in their hookah, and the presence of hookah references on Facebook.
- The validity of hookah references on Facebook remains unknown.

## ACKNOWLEDGEMENTS

The authors would like to thank Hope Villiard and Lauren Kacvinsky for their assistance with data collection.

## COMPETING INTERESTS

The authors have no competing interests.

## FUNDING

This work was supported by award R211AA017936 from NIAAA as well as award K12HD055894 from the Eunice Kennedy Shriver National Institute of Child Health and Human Development.

## CONTRIBUTORSHIP STATEMENT

As the first author, I, Libby Brockman, contributed to this paper by designing the project, and by acquiring, analyzing and interpreting the data for this study. I also provided statistical expertise and drafted the manuscript. My co-authors contributed as follows: Megan A Pumper actively participated in data collection, and provided technical support as well as a critical revision of the manuscript for important intellectual content. Dimitri A Christakis provided statistical expertise, administrative/technical/material support, and critical revisions of the manuscript for important intellectual content. Megan A Moreno contributed to this paper by providing conception and design efforts, funding, administrative/technical/material support, supervision, and a critical revision of the manuscript for important intellectual content.

## DATA SHARING STATEMENT

There is no additional unpublished data from this study.

## REFERENCES

1. CDC. Trends in current cigarette smoking among high school students and adults, United States, 1965-2010: Centers for Disease Control & Prevention, 2011.
2. Warner KE, Mendez D. Tobacco control policy in developed countries: yesterday, today, and tomorrow. *Nicotine Tob Res* 2010;**12**(9):876-87 doi: ntq125 [pii] 10.1093/ntr/ntq125[published Online First: Epub Date]].
3. Maziak W. The global epidemic of waterpipe smoking. *Addict Behav* 2011;**36**(1-2):1-5 doi: S0306-4603(10)00266-2 [pii] 10.1016/j.addbeh.2010.08.030[published Online First: Epub Date]].
4. Regulation WSGoTP. Advisory note: Waterpipe tobacco smoking: Health effects, research needs, and recommended actions by regulators. Geneva, Switzerland: World Health Organization, Tobacco Free Initiative, 2005.
5. Kandela P. Nargile smoking keeps Arabs in Wonderland. *Lancet* 2000;**356**(9236):1175
6. Warren CW, Lea V, Lee J, et al. Change in tobacco use among 13-15 year olds between 1999 and 2008: findings from the Global Youth Tobacco Survey. *Glob Health Promot* 2009;**16**(2 Suppl):38-90 doi: 16/2\_suppl/38 [pii] 10.1177/1757975909342192[published Online First: Epub Date]].
7. Primack BA, Sidani J, Agarwal AA, et al. Prevalence of and associations with waterpipe tobacco smoking among U.S. university students. *Ann Behav Med* 2008;**36**(1):81-6 doi: 10.1007/s12160-008-9047-6[published Online First: Epub Date]].
8. Fielder RL, Carey KB, Carey MP. Prevalence, frequency, and initiation of hookah tobacco smoking among first-year female college students: a one-year longitudinal study. *Addict Behav* 2012;**37**(2):221-4 doi: S0306-4603(11)00336-4 [pii] 10.1016/j.addbeh.2011.10.001[published Online First: Epub Date]].
9. Braun RE, Glassman T, Wohlwend J, et al. Hookah use among college students from a midwest university. *J Community Health* 2012;**37**(2):294-8 doi: 10.1007/s10900-011-9444-9[published Online First: Epub Date]].
10. Sutfin EL, McCoy TP, Reboussin BA, et al. Prevalence and correlates of waterpipe tobacco smoking by college students in North Carolina. *Drug Alcohol Depend* 2011;**115**(1-2):131-6 doi: S0376-8716(11)00083-4 [pii] 10.1016/j.drugalcdep.2011.01.018[published Online First: Epub Date]].
11. Grekin ER, Ayna D. Waterpipe smoking among college students in the United States: a review of the literature. *J Am Coll Health* 2012;**60**(3):244-9 doi: 10.1080/07448481.2011.589419[published Online First: Epub Date]].
12. Ray C. The hookah - the Indian waterpipe. *Current Science* 2009;**96**(10):1319-23
13. Knishkowsky B, Amitai Y. Water-pipe (narghile) smoking: an emerging health risk behavior. *Pediatrics* 2005;**116**(1):e113-9 doi: 116/1/e113 [pii] 10.1542/peds.2004-2173[published Online First: Epub Date]].
14. Carroll MV, Shensa A, Primack BA. A comparison of cigarette- and hookah-related videos on YouTube. *Tob Control* 2012 doi: tobaccocontrol-2011-050253 [pii] 10.1136/tobaccocontrol-2011-050253[published Online First: Epub Date]].
15. Gerbner G, Gross L, Morgan M, et al. Living with television: the dynamics of the cultivation process. In: Bryant J, Zillman D, eds. *Perpectives on Media Effects*. Hillsdale, NJ: Lawrence Erlbaum Associates, 1986:17-40.

16. Lewis K, Kaufman J, Christakis N. The taste for privacy: An analysis of college student privacy settings in an online social network. *Journal of Computer-Mediated Communication* 2008;14(1):79-100 doi: 10.1111/j.1083-6101.2008.01432.x[published Online First: Epub Date]].
17. Mass Interpersonal Persuasion: An Early View of a New Phenomenon. Third International Conference on Persuasive Technology; 2008; Berline. Springer.
18. Dalton MA, Beach ML, Adachi-Mejia AM, et al. Early exposure to movie smoking predicts established smoking by older teens and young adults. *Pediatrics* 2009;123(4):e551-8 doi: 10.1542/peds.2008-2102[published Online First: Epub Date]].
19. Neinstein L, Anderson M. Adolescent Development. In: Neinstein L, ed. *Adolescent Health Care: A Practical Guide*. Philadelphia: Lippincott Williams and Wilkins, 2002:767-92.
20. Strasburger VC, Wilson BJ, Jordan A. *Children, Adolescents and the Media*. Beverly Hills: Sage, 2008.
21. Moreno MA, Parks MR, Zimmerman FJ, et al. Display of health risk behaviors on MySpace by adolescents: Prevalence and Associations. *Archives of Pediatrics and Adolescent Medicine* 2009;163(1):35-41 [pii] 10.1016/j.jadohealth.2011.04.015[published Online First: Epub Date]].
22. Buffardi LE, Campbell WK. Narcissism and social networking Web sites. *Pers Soc Psychol Bull* 2008;34(10):1303-14 doi: 10.1177/0146167208320061 [pii] 10.1177/0146167208320061[published Online First: Epub Date]].
23. Moreno MA, Egan KG, Brockman L. Development of a researcher codebook for use in evaluating social networking site profiles. *J Adolesc Health* 2011;49(1):29-35 doi: S1054-139X(11)00148-0 [pii] 10.1016/j.jadohealth.2011.04.015[published Online First: Epub Date]].
24. Moreno M, Parks M, Zimmerman F, et al. Display of health risk behaviors on MySpace by adolescents: prevalence and associations. *Arch Pediatr Adolesc Med* 2009;163(1):27-34 doi: 10.1001/archpediatrics.2008.528[published Online First: Epub Date]].
25. ACHA ACHA. *National College Health Assessment II: Reference Group Executive Summary*, Spring 2011. Hanover, MD: American College Health Association, 2011.
26. Shihadeh A, Saleh R. Polycyclic aromatic hydrocarbons, carbon monoxide, "tar", and nicotine in the mainstream smoke aerosol of the narghile water pipe. *Food Chem Toxicol* 2005;43(5):655-61 doi: S0278-6915(05)00012-8 [pii] 10.1016/j.fct.2004.12.013[published Online First: Epub Date]].
27. Akl EA, Gaddam S, Gunukula SK, et al. The effects of waterpipe tobacco smoking on health outcomes: a systematic review. *Int J Epidemiol* 2010;39(3):834-57 doi: dyq002 [pii] 10.1093/ije/dyq002[published Online First: Epub Date]].
28. Jensen PD, Cortes R, Engholm G, et al. Waterpipe use predicts progression to regular cigarette smoking among Danish youth. *Subst Use Misuse* 2010;45(7-8):1245-61 doi: 10.3109/10826081003682909[published Online First: Epub Date]].
29. Smith-Simone S, Maziak W, Ward KD, et al. Waterpipe tobacco smoking: knowledge, attitudes, beliefs, and behavior in two U.S. samples. *Nicotine Tob Res* 2008;10(2):393-8 doi: 790124340 [pii] 10.1080/14622200701825023[published Online First: Epub Date]].
30. Smith SY, Curbow B, Stillman FA. Harm perception of nicotine products in college freshmen. *Nicotine Tob Res* 2007;9(9):977-82 doi: 781712955 [pii] 10.1080/14622200701540796[published Online First: Epub Date]].
31. Dugas E, Tremblay M, Low NC, et al. Water-pipe smoking among North American youths. *Pediatrics* 2010;125(6):1184-9 doi: peds.2009-2335 [pii] 10.1542/peds.2009-2335[published Online First: Epub Date]].

- 1  
2  
3  
4 32. Eissenberg T, Ward KD, Smith-Simone S, et al. Waterpipe tobacco smoking on a U.S. College campus:  
5 prevalence and correlates. *J Adolesc Health* 2008;42(5):526-9 doi: S1054-139X(07)00413-2 [pii]  
6 10.1016/j.jadohealth.2007.10.004[published Online First: Epub Date] | .  
7  
8 33. Fox HB, McManus MA, Arnold KN. Significant Multiple Risk Behaviors Among U.S. High School  
9 Students. Fact Sheet No. 8- March 2010. Washington, DC: The National Alliance to Advance  
10 Adolescent Health, 2010.  
11  
12 34. Moreno MA, Christakis DA, Egan KG, et al. Associations Between Displayed Alcohol References on  
13 Facebook and Problem Drinking Among College Students. *Arch Pediatr Adolesc Med* 2011 doi:  
14 archpediatrics.2011.180 [pii]  
15 10.1001/archpediatrics.2011.180[published Online First: Epub Date] | .  
16  
17 35. Moreno MA, Briner LR, Williams A, et al. Real use or "real cool": adolescents speak out about  
18 displayed alcohol references on social networking websites. *J Adolesc Health* 2009;45(4):420-2  
19 doi: S1054-139X(09)00165-7 [pii]  
20 10.1016/j.jadohealth.2009.04.015[published Online First: Epub Date] | .  
21  
22  
23  
24  
25  
26  
27  
28  
29  
30  
31  
32  
33  
34  
35  
36  
37  
38  
39  
40  
41  
42  
43  
44  
45  
46  
47  
48  
49  
50  
51  
52  
53  
54  
55  
56  
57  
58  
59  
60

STROBE Statement—Checklist of items that should be included in reports of *cross-sectional studies*

|                              | Item No | Recommendation                                                                                                                                                                                                                                                                                                                                                                                                |
|------------------------------|---------|---------------------------------------------------------------------------------------------------------------------------------------------------------------------------------------------------------------------------------------------------------------------------------------------------------------------------------------------------------------------------------------------------------------|
| <b>Title and abstract</b>    | 1       | (a) Indicate the study's design with a commonly used term in the title or the abstract<br>(b) Provide in the abstract an informative and balanced summary of what was done and what was found                                                                                                                                                                                                                 |
| <b>Introduction</b>          |         |                                                                                                                                                                                                                                                                                                                                                                                                               |
| Background/rationale         | 2       | Explain the scientific background and rationale for the investigation being reported                                                                                                                                                                                                                                                                                                                          |
| Objectives                   | 3       | State specific objectives, including any prespecified hypotheses                                                                                                                                                                                                                                                                                                                                              |
| <b>Methods</b>               |         |                                                                                                                                                                                                                                                                                                                                                                                                               |
| Study design                 | 4       | Present key elements of study design early in the paper                                                                                                                                                                                                                                                                                                                                                       |
| Setting                      | 5       | Describe the setting, locations, and relevant dates, including periods of recruitment, exposure, follow-up, and data collection                                                                                                                                                                                                                                                                               |
| Participants                 | 6       | (a) Give the eligibility criteria, and the sources and methods of selection of participants                                                                                                                                                                                                                                                                                                                   |
| Variables                    | 7       | Clearly define all outcomes, exposures, predictors, potential confounders, and effect modifiers. Give diagnostic criteria, if applicable                                                                                                                                                                                                                                                                      |
| Data sources/<br>measurement | 8*      | For each variable of interest, give sources of data and details of methods of assessment (measurement). Describe comparability of assessment methods if there is more than one group                                                                                                                                                                                                                          |
| Bias                         | 9       | Describe any efforts to address potential sources of bias                                                                                                                                                                                                                                                                                                                                                     |
| Study size                   | 10      | Explain how the study size was arrived at                                                                                                                                                                                                                                                                                                                                                                     |
| Quantitative variables       | 11      | Explain how quantitative variables were handled in the analyses. If applicable, describe which groupings were chosen and why                                                                                                                                                                                                                                                                                  |
| Statistical methods          | 12      | (a) Describe all statistical methods, including those used to control for confounding<br>(b) Describe any methods used to examine subgroups and interactions<br>(c) Explain how missing data were addressed<br>(d) If applicable, describe analytical methods taking account of sampling strategy<br>(e) Describe any sensitivity analyses                                                                    |
| <b>Results</b>               |         |                                                                                                                                                                                                                                                                                                                                                                                                               |
| Participants                 | 13*     | (a) Report numbers of individuals at each stage of study—eg numbers potentially eligible, examined for eligibility, confirmed eligible, included in the study, completing follow-up, and analysed<br>(b) Give reasons for non-participation at each stage<br>(c) Consider use of a flow diagram                                                                                                               |
| Descriptive data             | 14*     | (a) Give characteristics of study participants (eg demographic, clinical, social) and information on exposures and potential confounders<br>(b) Indicate number of participants with missing data for each variable of interest                                                                                                                                                                               |
| Outcome data                 | 15*     | Report numbers of outcome events or summary measures                                                                                                                                                                                                                                                                                                                                                          |
| Main results                 | 16      | (a) Give unadjusted estimates and, if applicable, confounder-adjusted estimates and their precision (eg, 95% confidence interval). Make clear which confounders were adjusted for and why they were included<br>(b) Report category boundaries when continuous variables were categorized<br>(c) If relevant, consider translating estimates of relative risk into absolute risk for a meaningful time period |
| Other analyses               | 17      | Report other analyses done—eg analyses of subgroups and interactions, and sensitivity analyses                                                                                                                                                                                                                                                                                                                |

|                          |    |                                                                                                                                                                            |
|--------------------------|----|----------------------------------------------------------------------------------------------------------------------------------------------------------------------------|
| <b>Discussion</b>        |    |                                                                                                                                                                            |
| Key results              | 18 | Summarise key results with reference to study objectives                                                                                                                   |
| Limitations              | 19 | Discuss limitations of the study, taking into account sources of potential bias or imprecision. Discuss both direction and magnitude of any potential bias                 |
| Interpretation           | 20 | Give a cautious overall interpretation of results considering objectives, limitations, multiplicity of analyses, results from similar studies, and other relevant evidence |
| Generalisability         | 21 | Discuss the generalisability (external validity) of the study results                                                                                                      |
| <b>Other information</b> |    |                                                                                                                                                                            |
| Funding                  | 22 | Give the source of funding and the role of the funders for the present study and, if applicable, for the original study on which the present article is based              |

\*Give information separately for exposed and unexposed groups.

**Note:** An Explanation and Elaboration article discusses each checklist item and gives methodological background and published examples of transparent reporting. The STROBE checklist is best used in conjunction with this article (freely available on the Web sites of PLoS Medicine at <http://www.plosmedicine.org/>, Annals of Internal Medicine at <http://www.annals.org/>, and Epidemiology at <http://www.epidem.com/>). Information on the STROBE Initiative is available at [www.strobe-statement.org](http://www.strobe-statement.org).

1  
2  
3  
4  
5  
6  
7  
8  
9  
10  
11  
12  
13  
14  
15  
16  
17  
18  
19  
20  
21  
22  
23  
24  
25  
26  
27  
28  
29  
30  
31  
32  
33  
34  
35  
36  
37  
38  
39  
40  
41  
42  
43  
44  
45  
46  
47  
48  
49  
50  
51  
52  
53  
54  
55  
56  
57  
58  
59  
60

## Hookah's New Popularity Among US College Students: A **Pilot** Study of The Characteristics of Hookah Smokers and Their Facebook Displays

Libby N Brockman<sup>1,2</sup>, Megan A Pumper<sup>3</sup>, Dimitri A Christakis, MD, MPH<sup>1,2</sup>, Megan A Moreno,  
MD, MEd, MPH<sup>3</sup>

<sup>1</sup>Center for Child Health Behavior and Development, Seattle Children's Research Institute,  
Seattle, WA USA, <sup>2</sup>School of Public Health, University of Washington, Seattle, WA USA,

<sup>3</sup>Department of Pediatrics, University of Wisconsin, Madison, WI USA

### CORRESPONDING AUTHOR:

Libby N Brockman

Seattle Children's Research Institute

Center for Child Health Behavior and Development

M/S CW8-6, PO Box 5371; Seattle, WA 98145

Libby.brockman@seattlechildrens.org

Work: 206-884-5074, Fax: 206-884-7801

**Keywords:** Hookah, tobacco, smoking, college students, social networking website

Word Count: 3,502



## ABSTRACT

**Objectives:** (1) To [confirm](#) the prevalence of hookah use among US college students. (2) To identify substances commonly smoked in hookahs and other substance use characteristics of hookah smokers. (3) Given the powerful influence of Facebook and its potential role in promoting behaviors, to assess the prevalence of hookah references on Facebook profiles.

**Design:** Cross sectional study.

**Setting:** Two large US universities; www.Facebook.com.

**Participants:** 307 Facebook profiles were coded and 216 of these profile owners completed an online survey. On average, participants were 18.8 years old (SD=0.7), female (54%), Caucasian (70.4%), and approximately half were from each university.

**Outcome measures:** Lifetime and frequency of hookah use, substance smoked in hookah, cigarette and marijuana use, hookah references displayed on Facebook.

**Results:** 27.8% of participants endorsed hookah use; there were no significant differences between age, gender, race, or university for hookah use. Hookah users reported smoking tobacco (78%), hash (12%) and both tobacco and marijuana/hash (10%) in their hookah. Compared to non-hookah smokers, hookah smokers were more likely to report using cigarettes (OR=3.41,95%CI=1.2-9.64) and marijuana (OR=15.01,95%CI= 6.5-34.65). Hookah references were present on 5% of Facebook profiles.

**Conclusions:** More than one quarter of college students smoke hookah. Most smoke tobacco in their hookah, and hookah smoking is associated with polysubstance use. Some hookah users reference this this behavior on Facebook. Hookah may present new risks for nicotine addiction in this population.

## INTRODUCTION

Tobacco use is the leading preventable cause of morbidity and mortality worldwide. Encouragingly, public health efforts have successfully decreased the prevalence of cigarette smoking in the US by half over the past 45 years.[1] This achievement is attributed to the first Surgeon General's report on smoking and health in 1964, taxation, indoor smoking bans, media advertising restrictions and counter-advertising campaigns, and increased public awareness of the harms associated with cigarette smoking.[2]

Despite this laudable public health accomplishment, the use of alternative forms of tobacco is currently rising, threatening these successful efforts. Of particular concern is the increasing popularity of hookah.[3] Hookah use, also known as shisha, narghile and waterpipe, is defined as the smoking of substances through a waterpipe such that the smoke passes through water and is cooled prior to inhalation. Smoking a waterpipe is a tradition dating back at least four centuries to origins in northern Africa and southwest Asia.[4] Until recently, smoking in this fashion remained primarily a tradition observed in Middle Eastern countries, most popular among adult men.[5]

Presently, hookah smoking is becoming an increasingly popular form of tobacco use worldwide. Spreading from the Eastern Mediterranean region, hookah use is now common in Western countries including Australia, the United Kingdom, Canada and the United States.[3] Further, hookah is becoming increasingly popular among youth. A recent global surveillance study examining time trends (1999-2008) of tobacco use in youth found an increase in hookah smoking amongst teens as young as 13-15 year olds.[3 6] In the United States, adolescents and young adults are at the forefront of this resurgence.

1  
2  
3        The understanding of hookah smoking patterns among youth remains incomplete.  
4  
5        Current estimates suggest 15-41% of undergraduate college students smoke hookah.[7-11]  
6  
7        However, while hashish or opium were once smoked in hookahs in the Middle East and India,[5  
8  
9  
10       12] smoking tobacco in hookahs was popularized in the 1990s with the introduction of *maasel*, a  
11  
12       sweetened and flavored tobacco product.[3] Some reports suggest marijuana, hashish or other  
13  
14       drugs are sometimes added to hookah tobacco.[13] However, the predominate substances  
15  
16       smoked in hookahs and other substance use practices of hookah users among US teens remain  
17  
18       unknown.  
19  
20

21  
22       Therefore, the primary purpose of this pilot study was to confirm the lifetime prevalence  
23  
24       of hookah smoking amongst undergraduate students at two large public universities in different  
25  
26       regions of the US. The second aim of this study was to identify the specific substance use  
27  
28       practices of hookah smokers, including the predominant substance that young adults smoke in  
29  
30       their hookah, and other substance use characteristics of hookah smokers. Identifying these  
31  
32       characteristics of hookah smokers has numerous public health and clinical implications, and is a  
33  
34       necessary step in developing targeted prevention and intervention strategies.  
35  
36  
37

38  
39       Finally, how and why hookah smoking is gaining popularity among young adults also  
40  
41       remains unclear. Many attribute hookah's popularity to its social nature; hookah use is a shared,  
42  
43       communal experience and two or more people often share a single waterpipe.[4 6] It is also  
44  
45       possible that new forms of media are playing a role in promoting hookah smoking among young  
46  
47       adults. Recent work suggests hookah-related videos on YouTube, compared to cigarette-related  
48  
49       videos, are less likely to reference the harmful consequences of smoking nor provide anti-  
50  
51       smoking messages.[14] As the cultivation theory suggests, online videos may influence viewers'  
52  
53  
54  
55  
56  
57  
58  
59  
60

1  
2  
3 opinions and perceptions; videos that fail to portray the negative consequences of hookah  
4  
5 smoking may serve to promote this behavior among young adults.[15]  
6  
7

8 The authors hypothesize that social networking websites (SNSs) may also popularize  
9  
10 hookah smoking by serving as a venue in which young adults learn about and promote hookah  
11  
12 use among their social groups. In recent years, SNSs such as Facebook, have become a  
13  
14 tremendously popular source of social media among adolescents and young adults; Facebook is  
15  
16 now used by over 90% of college students and is the most popular SNS among university  
17  
18 students.[16] While previous studies have found associations between consuming media, such as  
19  
20 television and movies, depicting tobacco and the initiation of tobacco use, it has been argued that  
21  
22 Facebook may have greater influence than traditional media because Facebook combines the  
23  
24 power of interpersonal persuasion with the reach of mass media. [17 18] Specifically for  
25  
26 adolescents and young adults, for whom peers are the most important source of influence, the  
27  
28 power of interpersonal persuasion cannot be underestimated.[19] Some suggest these websites  
29  
30 may serve as a media “super-peer” by promoting norms of behavior among adolescents.[20]  
31  
32 Additionally, social learning theory predicts that adolescents observe, imitate, and model  
33  
34 behaviors they see in their peers.  
35  
36  
37  
38  
39

40  
41 Thus, the third objective of this study was to conduct a pilot investigation of the presence  
42  
43 of hookah references on Facebook. As a social networking site, Facebook may provide a venue  
44  
45 for peer interaction and social networking, both of which are recognized as contributors to risk  
46  
47 behaviors.[21] Risk behaviors such as alcohol and drug use have been found to be displayed on  
48  
49 SNS profiles.[21] It is therefore possible that hookah is also displayed online within social  
50  
51 networks, but the extent to which this is so remains unknown.  
52  
53  
54  
55  
56  
57  
58  
59  
60

## METHODS

This study was conducted between September 2009 and December 2011 and received IRB approval from both the University of Wisconsin and the University of Washington.

### Setting

Participants for this study attended one of two large, public universities, in the Midwest and on the West Coast. Participants were recruited via the social networking website Facebook (www.Facebook.com). This SNS was selected because it is the most popular SNS among the target population of college students.[22]

### Subject selection

The Facebook search engine was used to identify random public profiles registered within either university network that listed a graduation year indicating the profile owner was a freshman, sophomore or junior student. Inclusion criteria required profile owners to report an age on their profile between 18 and 20 years and to show evidence of profile activity within the last 30 days.

In order to reach a target survey sample size of 200 participants, a total of 307 eligible Facebook profiles were identified in 2009 and 2010 and invited to participate in the study. All profiles returned in the search results were assessed sequentially for eligibility until the target sample size was reached. Profiles were excluded if they did not meet search criteria (ie, incorrectly listed), including those who were not undergraduates (N=448), did not meet the age criteria (N=313) or did not display their age (N=49). Profiles were also excluded if their profiles were completely private, had any one of the following sections set to private: information section, wall or photographs (N=1630), or if the profile owner was not reachable for recruitment

(ie, no phone number or email listed on Facebook profile or in the university directory) (N=303).

Demographic data was recorded from eligible profiles.

## Recruitment

The 307 profile owners with profiles that met inclusion criteria were called on the phone. The phone call served two purposes. First, profile owners identity and age were verified. Second, eligible students were then recruited to participate in the online survey. Survey invites were only sent to profile owners whose identity could be confirmed over the phone. The study was explained to the profile owner and permission was requested to send an email that contained further information about the study. If the participant consented to receive the email, an email was sent that provided detailed information about the study as well as a link to an online survey. The survey was administered online via a Catalyst WebQ online survey engine. Survey respondents were provided a \$15 iTunes gift card as compensation.

## Survey

The online survey evaluated hookah use. Participants were asked about their lifetime experience using hookah. Those who reported ever using hookah were also questioned about their frequency of use; answer options included never, monthly or less, 2-4 times a month, 2-3 times a week, 4 or more times a week. Participants were also asked what substances they typically smoked in their hookah; answer options included tobacco, marijuana, hash, a mix of marijuana/hash and tobacco. All participants were also questioned about their lifetime experience and frequency of use of marijuana and cigarettes, with similar answer options for frequency as described above.

## Facebook Profile Coding

1  
2  
3 To investigate the presence of hookah references on college student's Facebook profiles, all  
4  
5 307 profiles were evaluated once by one of three trained coders using a research codebook. This  
6  
7 codebook has been previously used to evaluating the display of other health risk behavior  
8  
9 references on SNS profiles such as alcohol and violence.<sup>[23 24]</sup> The codebook was adapted for  
10  
11 this to code for references to hookah. In order to determine whether hookah references were  
12  
13 present, coders viewed all publicly accessible elements of the Facebook profile including profile  
14  
15 owners' tagged pictures, profile pictures, information sections, and their Wall. Both images and  
16  
17 text were coded and hookah reference data included the coder's typewritten description of any  
18  
19 image references or verbatim text from profiles usually found in the form of status updates or in  
20  
21 info section. If present, identifiable information was removed from text references. One year of  
22  
23 profile data was assessed for each participant, starting from the date of evaluation and going back  
24  
25 to the same date, one year prior.  
26  
27  
28  
29  
30

31  
32 Profiles were categorized into one of two groups. Profiles with one or more references to  
33  
34 hookah use were classified as hookah "Displayers". Example references included personal  
35  
36 photographs in which the profile owner was smoking a hookah, or text references describing  
37  
38 smoking hookah. Only photographs that contained the profile owner with a clearly identifiable  
39  
40 hookah and text references that explicitly mentioned the word hookah or a synonym of hookah,  
41  
42 such as shisha or narghile, were coded. Profiles without any hookah references were considered  
43  
44 "Non-Displayers".  
45  
46  
47

48 Because of infrequent references to hookah on Facebook, interrater agreement was used to  
49  
50 assess coder reliability. A 20% random subsample of profiles was evaluated by all three coders  
51  
52 and 96% interrater reliability was achieved.  
53  
54

## 55 **Analysis**

56  
57  
58  
59  
60

Demographic characteristics, frequency and prevalence of hookah use, and Facebook displays of hookah were summarized using descriptive statistics. Bivariate logistic regression was used to examine covariates of lifetime hookah use (outcome); odds ratios and their 95% confidence intervals were obtained for independent variables including age, gender, race/ethnicity, university, and substance use. A multivariate model of lifetime hookah use was also fit, including the covariates of age, gender, race/ethnicity, university, and substance use. Bivariate comparisons between demographic characteristics and hookah Displayer/Non-Displayer groups were conducted using Fisher's exact tests and Chi squared tests. All statistical analyses were conducted using STATA version 11.0 (Statacorp, College Station, TX). A two-sided p-value  $p < 0.05$  was considered statistically significant.

## RESULTS

### Subjects

A total of 307 Facebook profiles were coded; 216 (70% response rate) of these individuals completed all survey questions with viable answers and were included in the analyses. Participants had an average age of 18.8 years (SD 0.7), were 54.2% female and 70.4% Caucasian. Approximately half of participants were from each university. See Table 1 for further details. (Table 1)

**Table 1. Descriptive characteristics of survey respondents (n=216)**

| Variable              | Percent (n)       |                          |                     |
|-----------------------|-------------------|--------------------------|---------------------|
|                       | Total             | Hookah Non-Users (n=153) | Hookah Users (n=60) |
| Age (yr) <sup>a</sup> |                   |                          |                     |
| 18                    | 35.7% (77)        | 36.5% (57)               | 33.3% (20)          |
| 19                    | 50.9% (110) (110) | 48.1% (75)               | 58.3% (35)          |
| 20                    | 13.4% (29)        | 15.4% (24)               | 8.33% (5)           |
| Gender                |                   |                          |                     |
| Male                  | 47.2% (102)       | 45.5% (71)               | 51.7% (31)          |



|                                                  |             |             |            |
|--------------------------------------------------|-------------|-------------|------------|
| Female                                           | 52.8% (114) | 54.5% (85)  | 48.3% (29) |
| State                                            |             |             |            |
| Washington                                       | 46.8% (101) | 47.4% (74)  | 45.0% (27) |
| Wisconsin                                        | 53.2% (115) | 52.6% (82)  | 55.0% (33) |
| Race/Ethnicity <sup>b</sup>                      |             |             |            |
| Caucasian                                        | 70.4% (150) | 68.0% (104) | 76.7% (46) |
| African American                                 | 0%          | 0%          | 0%         |
| Asian/Pacific Islander                           | 18.8% (40)  | 20.9% (32)  | 13.3% (8)  |
| Hispanic                                         | 2.3% (5)    | 2.6% (4)    | 1.7% (1)   |
| Other/Multiracial                                | 8.5% (18)   | 8.5% (13)   | 8.3% (5)   |
| <sup>a</sup> Overall mean (SD), 18.8 (0.7) years |             |             |            |
| <sup>b</sup> 3 missing values                    |             |             |            |

## Survey Results

### *Prevalence of hookah use*

Lifetime hookah use was reported by 27.8% (N=60) of participants (Table 2).

Participants who reported ever using hookah were on average 18.8 (SD 0.6) years of age, and tended to be male (51.7%) and White (76.7%) (Table 1). There were no significant differences between age, gender, race, or university for hookah use. Of those who **reported** ever smoking hookah, 78.3% smoked hookah monthly or less and 21.6% were current users who reported smoking hookah more than once per month.

**Table 2. Survey Results: Endorsement of Substance Use**

| Variable               | Percent (n) |                               |                           |
|------------------------|-------------|-------------------------------|---------------------------|
|                        | Total       | Hookah Non-Users <sup>a</sup> | Hookah Users <sup>b</sup> |
| Hookah                 | 27.8% (60)  | 0%                            | 100% (60)                 |
| Cigarettes             | 16.2% (35)  | 7.1% (11)                     | 40% (24)                  |
| Marijuana <sup>c</sup> | 30.7% (66)  | 13.6% (21)                    | 75% (45)                  |

<sup>a</sup> N=156

<sup>b</sup> N=60

<sup>c</sup> 3 missing values

### *Substances smoked in the hookah*

More than three-quarters (78%) of those who reported ever smoking hookah reported primarily smoking tobacco in their hookah. Only 12% reported smoking only hash in their hookah, while 10%

[reported smoking both marijuana/hash and tobacco in their hookah. A total of 22% reported using a hookah to smoke marijuana.](#)

### *Hookah users engagement with other substances*

Of those who reported ever using hookah, 40% reported ever smoking cigarettes, of whom 42.7% [reported](#) smoking cigarettes more than once a month. Most (75%) hookah users reported ever using marijuana, of whom 51% reported using marijuana more than once per month. No hookah users endorsed cigarette use only; [all hookah smokers who smoked cigarettes also smoked marijuana.](#) (Table 3)

**Table 3. Survey Results: Endorsement of Substance Use by Hookah Use**

| Variable                              | Percent (n)     |                |                        |           |
|---------------------------------------|-----------------|----------------|------------------------|-----------|
|                                       | Cigarettes only | Marijuana only | Cigarettes & Marijuana | None      |
| Hookah Users (N=60)                   | 0               | 35% (21)       | 40% (24)               | 25% (15)  |
| Hookah Non Users (N=155) <sup>a</sup> | 4.5% (7)        | 11% (17)       | 2.5% (4)               | 82% (127) |

<sup>a</sup> 1 missing value

Multivariate modeling of lifetime hookah use indicated that those who endorsed hookah use were more likely to report other substance use. Hookah users were more likely to use cigarettes (OR=3.41,  $p<0.05$ ) and marijuana (OR=15.01,  $p<0.001$ ) compared to non-hookah smokers. (Table 4)

**Table 4. Multivariate logistic regression modeling of lifetime hookah use (n=216)**

| Variable               | Unadjusted OR (95% CI) | Adjusted OR* (95% CI) |
|------------------------|------------------------|-----------------------|
| <b>Age</b>             | 0.92 (0.58-1.44)       | 0.86 (0.47-1.57)      |
| <b>Gender</b>          | 0.78 (0.43-1.42)       | 1.22 (0.55-2.70)      |
| <b>Race</b>            |                        |                       |
| Caucasian              | Reference group        | Reference group       |
| Asian/Pacific Islander | 0.57 (0.24-1.32)       | 0.59 (0.18-1.99)      |
| Hispanic               | 0.57 (0.60-5.20)       | 0.19 (.02-2.45)       |
| Other/Multiracial      | 0.87 (0.29-2.58)       | 2.25 (0.58-8.75)      |

|                                                                  |                    |                      |
|------------------------------------------------------------------|--------------------|----------------------|
| University                                                       | 1.1 (0.61-2.00)    | 0.95 (0.40-2.26)     |
| Cigarettes                                                       | 8.79 (3.94-19.59)  | 3.41 (1.20-9.64)**   |
| Marijuana                                                        | 19.14 (9.10-40.27) | 15.01 (6.50-34.65)** |
| * Odds ratios were adjusted for all other variables in the table |                    |                      |
| ** $p < 0.05$                                                    |                    |                      |

## Facebook results

Hookah references were present on 5.3% of Facebook profiles. There were no significant differences in hookah display between gender, race, or university. Examples of hookah references included personal images of profile owners smoking a hookah, downloaded images of icons saying “I ♥ HOOKAH”, or status updates such as “Tonight is a hookah type of night, I love nights like these” and “Skippin’ class all day, goin’ hookah shopping, fun!”

## DISCUSSION

This study explored characteristics of college student hookah smokers and evaluated the presence of hookah references displayed on university students’ [public](#) Facebook pages. More than one quarter of college students reported smoking hookah and this prevalence estimate is consistent with the [national estimate of hookah use among young adults enrolled in college](#).<sup>[25]</sup> To [the author’s](#) knowledge, this is the first study to survey college students about what substances they smoke in their hookah. The majority of hookah smokers reported smoking tobacco in their hookah, yet more than 20% reported experience with using marijuana or hash in their hookah. These findings support the rising popularity and diversity of hookah use among young adults in the US.

The finding that so many [college](#) students are smoking hookah, and specifically smoking tobacco in their hookah, is cause for clinical and public health concern. Although the health effects of hookah have not been studied nearly as extensively as cigarettes, smoking tobacco in a

1  
2  
3 waterpipe is associated with negative health outcomes similar to those associated with cigarette  
4 use. Studies compare hookah to cigarettes and illustrate that both forms of tobacco use expose  
5 smokers to toxicants associated with cardiovascular and lung disease, including carbon  
6  
7  
8  
9  
10  
11  
12  
13  
14  
15  
16  
17  
18  
19  
20  
21  
22  
23  
24  
25  
26  
27  
28  
29  
30  
31  
32  
33  
34  
35  
36  
37  
38  
39  
40  
41  
42  
43  
44  
45  
46  
47  
48  
49  
50  
51  
52  
53  
54  
55  
56  
57  
58  
59  
60

waterpipe is associated with negative health outcomes similar to those associated with cigarette use. Studies compare hookah to cigarettes and illustrate that both forms of tobacco use expose smokers to toxicants associated with cardiovascular and lung disease, including carbon monoxide and polycyclic aromatic hydrocarbons.[3 26] Further, hookah use significantly increases one's risk for lung cancer, respiratory illness, low birthweight and periodontal disease.[27] Lastly, preliminary research shows hookah use may be associated with nicotine dependence and could be a gateway drug to cigarette smoking.[3 28]

These negative health consequences of hookah use are compounded by the many misperceptions and incorrect beliefs and attitudes held by hookah users. Many hookah smokers underestimate the health risks and addictive properties of hookah use. Contrary to the published harms of hookah use, college students and young adults believe smoking tobacco in a waterpipe is less harmful and less addictive than cigarettes and believe they can quit anytime.[29 30]

Similar to other studies, [the results of this study suggest](#) that hookah users were more likely than non-hookah users to engage in substance use (separate from their hookah smoking) such as marijuana, cigarettes and other psychoactive drugs.[10 31 32] Due to the cross-sectional nature of this study, [it is impossible](#) to determine the temporal sequence of hookah smoking and the use of other substances. However, it may not be surprising that hookah smokers also engage in other substance use behaviors. Previous research supports that engagement in one risk behavior is often associated with an increased likelihood of engaging in other risk behaviors.[33] This may be especially true for hookah, cigarettes, and marijuana, all different means of smoking. It may be that once a college student decides to engage in a smoking behavior, they may be open to a variety of smoking behaviors. [These results suggest hookah prevention efforts may be paired with other substance use and general smoking prevention strategies.](#)

1  
2  
3  
4  
5  
6  
7  
8  
9  
10  
11  
12  
13  
14  
15  
16  
17  
18  
19  
20  
21  
22  
23  
24  
25  
26

The findings that one in five hookah smokers smoke marijuana in their hookah and that hookah smokers are more likely to smoke marijuana separately compared to non-hookah smokers, are important for two reasons. First, given that many college students maintain that hookah smoking is a safe alternative to cigarette smoking and that hookah smoking doesn't constitute "smoking",<sup>[11]</sup> it is possible that these young adults differentiate between methods of tobacco use. Similarly, college students may have altered perceptions of the safety of smoking marijuana in a hookah. Second, given the integration of hookah smoking into the social scene on college campuses<sup>[11]</sup>, it is possible that marijuana may also experience a sort of social promotion when associated with hookah. This may have implications for intervention strategies and further work is needed to explore these ideas.

27  
28  
29  
30  
31  
32  
33  
34  
35  
36  
37  
38  
39  
40  
41  
42  
43  
44  
45  
46  
47  
48  
49  
50  
51  
52  
53  
54  
55  
56  
57  
58  
59  
60

To the best of the authors' knowledge, this is also the first study to investigate hookah use using Facebook. These findings show more than 5% of college student profiles display references to hookah on Facebook. While this percentage does not compare with the prevalence of smoking hookah, hookah references on SNSs have not yet been extensively studied. Other work illustrates that adolescents display references to other risk behaviors such as alcohol and substance use on their SNS profile.<sup>[21]</sup> These displays of various risk behaviors may represent engagement in that behavior, consideration of engagement in the behavior, boastful claims, or nonsense.<sup>[21]</sup> College students who display references to intoxication or problem drinking on their Facebook profile were more likely to meet clinical criteria for problem drinking compared to those who do not display such references.<sup>[34]</sup> Additionally, adolescents interpret alcohol displays on SNSs to be influential and valid representations of alcohol use.<sup>[35]</sup> Thus, these displays are meaningful. Given the social nature of hookah smoking, the social dimension of Facebook may be a salient factor in popularizing hookah use. Since students mainly initiate and

1  
2  
3 practice hookah use with friends, Facebook may allow them to find such friends. Further  
4  
5 research exploring [the presence and meaning of specifically hookah displays on Facebook](#)  
6  
7 [profiles](#) is necessary.  
8  
9

10  
11 There are several potential limitations to this study. First, participants were recruited from  
12  
13 [only two universities and the study sample included very few minority and no African American](#)  
14  
15 [participants. While the study sample is demographically representative of the student population](#)  
16  
17 [at the two selected universities, it is possible that these two universities do not provide a](#)  
18  
19 [representative sample of the US college population. The literature suggests that after students of](#)  
20  
21 [Arab descent, Caucasian students, followed by Asian students have the highest reported](#)  
22  
23 [prevalence rates of smoking hookah.](#)[11] [Therefore,](#) given [that the](#) participants were selected  
24  
25 from large geographically distinct state universities and that [these](#) prevalence estimates are  
26  
27 consistent with other studies' estimates, this suggests [the results may be generalizable to the US](#)  
28  
29 [college population.](#) Second, [only profiles from one SNS were evaluated](#) and participants were  
30  
31 limited to those who maintained a public Facebook profile and allowed their phone numbers to  
32  
33 be listed in [either](#) the university directory or on Facebook. The extent to which findings could be  
34  
35 generalized to profiles that have their security set to private, to profiles on other SNSs, or to  
36  
37 younger adolescent populations is not known. It is important to note that SNS profile privacy  
38  
39 settings are not permanent; profile owners may change their privacy settings at any time or to  
40  
41 reflect what security upgrades are offered by Facebook. It is unclear whether profile owners who  
42  
43 maintained a private profile at the time of this study would be more likely, or less likely, to  
44  
45 display hookah references. [Lastly, the cross-sectional design of this study precluded determining](#)  
46  
47 [the temporal sequence of smoking hookah and engagement in other substance use. Future](#)  
48  
49  
50  
51  
52  
53  
54  
55  
56  
57  
58  
59  
60

1  
2  
3 [research including longitudinal studies are needed to explore these associations, especially the](#)  
4  
5  
6 [potential role of hookah as a gateway to cigarette smoking.](#)  
7

8 Despite these limitations, [the](#) findings have important implications. First, this is the first  
9  
10 study to illustrate that hookah use goes beyond tobacco. [College students](#) also smoke marijuana  
11  
12 and hash in their hookah. With this understanding, future prevention and intervention methods  
13  
14 may pair existing tobacco and marijuana strategies when targeting college hookah smokers.  
15

16  
17 Second, hookah use is also emerging on Facebook profiles, which may [help](#) promote the illusion  
18  
19 that it is a socially acceptable behavior and safe alternative to cigarettes. [To determine if hookah](#)  
20  
21 [references aid in the promotion of hookah smoking among college students, more work is](#) needed  
22  
23 to [explore the presence and meaning of hookah displays on Facebook. Further, similar to studies](#)  
24  
25 [which have found Facebook to be feasible for identifying college students at risk for problem](#)  
26  
27 [drinking, more work is needed to determine if SNSs may also be](#) helpful for screening [and](#)  
28  
29 [identifying college students at risk for or engaged in hookah smoking.](#)  
30  
31  
32  
33  
34  
35

### 36 **WHAT THIS PAPER ADDS**

37  
38 Hookah smoking is a popular alternative form of tobacco use among US college students.  
39  
40 However, patterns of use and characteristics of young hookah smokers remain unclear, as does  
41  
42 why hookah is particularly attractive to this population. This paper adds to our understanding of  
43  
44 hookah use by identifying the predominate substances college students smoke in a hookah, their  
45  
46 [patterns of](#) use of other substances, and how hookah is displayed on their Facebook profiles.  
47  
48  
49 Hookah may present new risks for nicotine addiction in this population and our results have  
50  
51 implications for the content and perhaps venue of future interventions.  
52  
53  
54  
55  
56  
57  
58  
59  
60

## ARTICLE SUMMARY

### Article Focus:

- To confirm the prevalence of hookah use among US college students
- To identify characteristics of US college student smokers, including substances typically smoked in a hookah
- To determine the prevalence of hookah references on Facebook profiles belonging to US college students

### Key Messages:

- Hookah smoking is becoming increasingly popular and more than 25% of college students smoke hookah.
- Hookah smoking is significantly associated with cigarette and marijuana use, and some college students smoke marijuana in their hookah.
- Some college students reference hookah on their Facebook profiles.

### Strengths and Limitations of this study:

- This is the first study to examine what substances college hookah smokers use in their hookah, and the presence of hookah references on Facebook.
- The validity of hookah references on Facebook remains unknown.

## **ACKNOWLEDGEMENTS**

The authors would like to thank Hope Villiard and Lauren Kacvinsky for their assistance with data collection.

## **COMPETING INTERESTS**



1  
2  
3 The authors have no competing interests.  
4  
5  
6  
7

## 8 FUNDING

9  
10 This work was supported by award R211AA017936 from NIAAA as well as award  
11  
12 K12HD055894 from the Eunice Kennedy Shriver National Institute of Child Health and Human  
13  
14 Development.  
15  
16  
17  
18  
19

## 20 CONTRIBUTORSHIP STATEMENT

21  
22 As the first author, I, Libby Brockman, contributed to this paper by designing the project, and by  
23  
24 acquiring, analyzing and interpreting the data for this study. I also provided statistical expertise  
25  
26 and drafted the manuscript. My co-authors contributed as follows: Megan A Pumper actively  
27  
28 participated in data collection, and provided technical support as well as a critical revision of the  
29  
30 manuscript for important intellectual content. Dimitri A Christakis provided statistical expertise,  
31  
32 administrative/technical/material support, and critical revisions of the manuscript for important  
33  
34 intellectual content. Megan A Moreno contributed to this paper by providing conception and  
35  
36 design efforts, funding, administrative/technical/material support, supervision, and a critical  
37  
38 revision of the manuscript for important intellectual content.  
39  
40  
41  
42  
43  
44  
45

## 46 DATA SHARING STATEMENT

47  
48 There is no additional unpublished data from this study.  
49  
50  
51  
52  
53  
54  
55  
56  
57  
58  
59  
60

## REFERENCES

1. CDC. Trends in current cigarette smoking among high school students and adults, United States, 1965-2010: Centers for Disease Control & Prevention, 2011.
2. Warner KE, Mendez D. Tobacco control policy in developed countries: yesterday, today, and tomorrow. *Nicotine Tob Res* 2010;**12**(9):876-87 doi: ntq125 [pii] 10.1093/ntr/ntq125[published Online First: Epub Date]].
3. Maziak W. The global epidemic of waterpipe smoking. *Addict Behav* 2011;**36**(1-2):1-5 doi: S0306-4603(10)00266-2 [pii] 10.1016/j.addbeh.2010.08.030[published Online First: Epub Date]].
4. Regulation WSGoTP. Advisory note: Waterpipe tobacco smoking: Health effects, research needs, and recommended actions by regulators. Geneva, Switzerland: World Health Organization, Tobacco Free Initiative, 2005.
5. Kandela P. Nargile smoking keeps Arabs in Wonderland. *Lancet* 2000;**356**(9236):1175
6. Warren CW, Lea V, Lee J, et al. Change in tobacco use among 13-15 year olds between 1999 and 2008: findings from the Global Youth Tobacco Survey. *Glob Health Promot* 2009;**16**(2 Suppl):38-90 doi: 16/2\_suppl/38 [pii] 10.1177/1757975909342192[published Online First: Epub Date]].
7. Primack BA, Sidani J, Agarwal AA, et al. Prevalence of and associations with waterpipe tobacco smoking among U.S. university students. *Ann Behav Med* 2008;**36**(1):81-6 doi: 10.1007/s12160-008-9047-6[published Online First: Epub Date]].
8. Fielder RL, Carey KB, Carey MP. Prevalence, frequency, and initiation of hookah tobacco smoking among first-year female college students: a one-year longitudinal study. *Addict Behav* 2012;**37**(2):221-4 doi: S0306-4603(11)00336-4 [pii] 10.1016/j.addbeh.2011.10.001[published Online First: Epub Date]].
9. Braun RE, Glassman T, Wohlwend J, et al. Hookah use among college students from a midwest university. *J Community Health* 2012;**37**(2):294-8 doi: 10.1007/s10900-011-9444-9[published Online First: Epub Date]].
10. Sutfin EL, McCoy TP, Reboussin BA, et al. Prevalence and correlates of waterpipe tobacco smoking by college students in North Carolina. *Drug Alcohol Depend* 2011;**115**(1-2):131-6 doi: S0376-8716(11)00083-4 [pii] 10.1016/j.drugalcdep.2011.01.018[published Online First: Epub Date]].
11. Grekin ER, Ayna D. Waterpipe smoking among college students in the United States: a review of the literature. *J Am Coll Health* 2012;**60**(3):244-9 doi: 10.1080/07448481.2011.589419[published Online First: Epub Date]].
12. Ray C. The hookah - the Indian waterpipe. *Current Science* 2009;**96**(10):1319-23
13. Knishkowsky B, Amitai Y. Water-pipe (narghile) smoking: an emerging health risk behavior. *Pediatrics* 2005;**116**(1):e113-9 doi: 116/1/e113 [pii] 10.1542/peds.2004-2173[published Online First: Epub Date]].
14. Carroll MV, Shensa A, Primack BA. A comparison of cigarette- and hookah-related videos on YouTube. *Tob Control* 2012 doi: tobaccocontrol-2011-050253 [pii] 10.1136/tobaccocontrol-2011-050253[published Online First: Epub Date]].
15. Gerbner G, Gross L, Morgan M, et al. Living with television: the dynamics of the cultivation process. In: Bryant J, Zillman D, eds. *Perpectives on Media Effects*. Hillsdale, NJ: Lawrence Erlbaum Associates, 1986:17-40.
16. Lewis K, Kaufman J, Christakis N. The taste for privacy: An analysis of college student privacy settings in an online social network. *Journal of Computer-Mediated Communication* 2008;**14**(1):79-100 doi: 10.1111/j.1083-6101.2008.01432.x[published Online First: Epub Date]].

17. Mass Interpersonal Persuasion: An Early View of a New Phenomenon. Third International Conference on Persuasive Technology; 2008; Berline. Springer.
18. Dalton MA, Beach ML, Adachi-Mejia AM, et al. Early exposure to movie smoking predicts established smoking by older teens and young adults. *Pediatrics* 2009;123(4):e551-8 doi: 123/4/e551 [pii] 10.1542/peds.2008-2102[published Online First: Epub Date] | .
19. Neinstein L, Anderson M. Adolescent Development. In: Neinstein L, ed. *Adolescent Health Care: A Practical Guide*. Philadelphia: Lippincott Williams and Wilkins, 2002:767-92.
20. Strasburger VC, Wilson BJ, Jordan A. *Children, Adolescents and the Media*. Beverly Hills: Sage, 2008.
21. Moreno MA, Parks MR, Zimmerman FJ, et al. Display of health risk behaviors on MySpace by adolescents: Prevalence and Associations. *Archives of Pediatrics and Adolescent Medicine* 2009;163(1):35-41
22. Buffardi LE, Campbell WK. Narcissism and social networking Web sites. *Pers Soc Psychol Bull* 2008;34(10):1303-14 doi: 0146167208320061 [pii] 10.1177/0146167208320061[published Online First: Epub Date] | .
23. Moreno MA, Egan KG, Brockman L. Development of a researcher codebook for use in evaluating social networking site profiles. *J Adolesc Health* 2011;49(1):29-35 doi: S1054-139X(11)00148-0 [pii] 10.1016/j.jadohealth.2011.04.015[published Online First: Epub Date] | .
24. Moreno M, Parks M, Zimmerman F, et al. Display of health risk behaviors on MySpace by adolescents: prevalence and associations. *Arch Pediatr Adolesc Med* 2009;163(1):27-34 doi: 163/1/27 [pii] 10.1001/archpediatrics.2008.528[published Online First: Epub Date] | .
25. ACHA ACHA. *National College Health Assessment II: Reference Group Executive Summary*, Spring 2011. Hanover, MD: American College Health Association, 2011.
26. Shihadeh A, Saleh R. Polycyclic aromatic hydrocarbons, carbon monoxide, "tar", and nicotine in the mainstream smoke aerosol of the narghile water pipe. *Food Chem Toxicol* 2005;43(5):655-61 doi: S0278-6915(05)00012-8 [pii] 10.1016/j.fct.2004.12.013[published Online First: Epub Date] | .
27. Akl EA, Gaddam S, Gunukula SK, et al. The effects of waterpipe tobacco smoking on health outcomes: a systematic review. *Int J Epidemiol* 2010;39(3):834-57 doi: dyq002 [pii] 10.1093/ije/dyq002[published Online First: Epub Date] | .
28. Jensen PD, Cortes R, Engholm G, et al. Waterpipe use predicts progression to regular cigarette smoking among Danish youth. *Subst Use Misuse* 2010;45(7-8):1245-61 doi: 10.3109/10826081003682909[published Online First: Epub Date] | .
29. Smith-Simone S, Maziak W, Ward KD, et al. Waterpipe tobacco smoking: knowledge, attitudes, beliefs, and behavior in two U.S. samples. *Nicotine Tob Res* 2008;10(2):393-8 doi: 790124340 [pii] 10.1080/14622200701825023[published Online First: Epub Date] | .
30. Smith SY, Curbow B, Stillman FA. Harm perception of nicotine products in college freshmen. *Nicotine Tob Res* 2007;9(9):977-82 doi: 781712955 [pii] 10.1080/14622200701540796[published Online First: Epub Date] | .
31. Dugas E, Tremblay M, Low NC, et al. Water-pipe smoking among North American youths. *Pediatrics* 2010;125(6):1184-9 doi: peds.2009-2335 [pii] 10.1542/peds.2009-2335[published Online First: Epub Date] | .
32. Eissenberg T, Ward KD, Smith-Simone S, et al. Waterpipe tobacco smoking on a U.S. College campus: prevalence and correlates. *J Adolesc Health* 2008;42(5):526-9 doi: S1054-139X(07)00413-2 [pii] 10.1016/j.jadohealth.2007.10.004[published Online First: Epub Date] | .

- 1  
2  
3  
4  
5  
6  
7  
8  
9  
10  
11  
12  
13  
14  
15  
16  
17  
18  
19  
20  
21  
22  
23  
24  
25  
26  
27  
28  
29  
30  
31  
32  
33  
34  
35  
36  
37  
38  
39  
40  
41  
42  
43  
44  
45  
46  
47  
48  
49  
50  
51  
52  
53  
54  
55  
56  
57  
58  
59  
60
33. Fox HB, McManus MA, Arnold KN. Significant Multiple Risk Behaviors Among U.S. High School Students. Fact Sheet No. 8- March 2010. Washington, DC: The National Alliance to Advance Adolescent Health, 2010.
34. Moreno MA, Christakis DA, Egan KG, et al. Associations Between Displayed Alcohol References on Facebook and Problem Drinking Among College Students. Arch Pediatr Adolesc Med 2011 doi: archpediatrics.2011.180 [pii] 10.1001/archpediatrics.2011.180[published Online First: Epub Date] | .
35. Moreno MA, Briner LR, Williams A, et al. Real use or "real cool": adolescents speak out about displayed alcohol references on social networking websites. J Adolesc Health 2009;45(4):420-2 doi: S1054-139X(09)00165-7 [pii] 10.1016/j.jadohealth.2009.04.015[published Online First: Epub Date] | .
